# Supplementary material for: Evolution of multifunctionality through a pleiotropic substitution in the innate immune protein S100A9
Source: eLife journal article supplement (doi:10.7554/elife.54100), 2020-04-07
Supplement: supp [file elife-54100-supp-v1.zip]

Susceptible

hA9  
mA9  
opA9  
ancA9

|   |   |   |   |   |   |   |   |   |   |   |   |   |   |   |   |   |   |   |   |   |   |   |   |   |   |   |   |   |   |   |   |   |   |   |   |   |   |   |   |   |   |   |   |   |   |   |   |   |   |   |   |   |   |   |   |   |   |   |   |   |   |   |   |   |   |   |   |   |   |   |   |   |   |   |   |   |   |   |   |   |   |   |   |   |   |   |
|---|---|---|---|---|---|---|---|---|---|---|---|---|---|---|---|---|---|---|---|---|---|---|---|---|---|---|---|---|---|---|---|---|---|---|---|---|---|---|---|---|---|---|---|---|---|---|---|---|---|---|---|---|---|---|---|---|---|---|---|---|---|---|---|---|---|---|---|---|---|---|---|---|---|---|---|---|---|---|---|---|---|---|---|---|---|---|
| 1 | M | S | Q | L | E | R | N | I | E | T | I | I | N | T | F | H | Q | Y | S | V | K | L | G | H | P | D | T | L | N | Q | G | E | F | K | E | L | V | R | K | D | L | Q | N | F | L | K | K | E | N | K | N | E | K | V | I | E | H | I | M | E | D | L | D | T | N | A | D | K | Q | L | S | F | E | E | F | I | M | L | M | A | R | L | T | W | A | S |
|   | P | S | Q | M | E | R | S | I | T | T | I | I | D | T | F | H | Q | Y | S | R | K | E | G | H | P | D | T | L | S | K | K | E | F | R | Q | M | V | E | A | Q | L | A | T | F | M | K | K | E | K | R | N | E | A | L | I | N | D | I | M | E | D | L | D | T | N | Q | D | N | Q | L | S | F | E | E | C | M | M | L | M | A | K | L | I | F | A | C |
|   | N | C | T | M | E | K | A | L | D | I | I | V | N | T | F | H | H | Y | S | T | R | V | G | N | P | D | T | L | V | K | G | E | M | K | Q | L | I | T | K | E | L | P | N | F | I | K | N | A | - | K | D | L | Q | D | V | K | H | L | M | Q | E | L | D | T | N | Q | N | G | Q | V | D | F | K | E | F | S | M | M | M | A | R | L | T | M | A | T |
|   | M | S | Q | L | E | K | A | I | E | T | I | I | N | V | F | H | Q | Y | S | V | R | V | G | H | P | D | T | L | N | K | K | E | L | K | Q | L | I | Q | K | E | L | P | N | F | L | K | N | A | K | K | D | P | Q | T | I | N | H | L | M | Q | E | L | D | T | N | Q | D | G | Q | I | S | F | E | E | F | M | M | L | V | A | R | L | T | V | A | S |

Resistant

altancA9  
hA12  
chMRP126  
ancCG  
altancCG

|  |   |   |   |   |   |   |   |   |   |   |   |   |   |   |   |   |   |   |   |   |   |   |   |   |   |   |   |   |   |   |   |   |   |   |   |   |   |   |   |   |   |   |   |   |   |   |   |   |   |   |   |   |   |   |   |   |   |   |   |   |   |   |   |   |   |   |   |   |   |   |   |   |   |   |   |   |   |   |   |   |   |   |   |   |   |   |
|--|---|---|---|---|---|---|---|---|---|---|---|---|---|---|---|---|---|---|---|---|---|---|---|---|---|---|---|---|---|---|---|---|---|---|---|---|---|---|---|---|---|---|---|---|---|---|---|---|---|---|---|---|---|---|---|---|---|---|---|---|---|---|---|---|---|---|---|---|---|---|---|---|---|---|---|---|---|---|---|---|---|---|---|---|---|---|
|  | M | S | E | L | E | K | S | I | E | T | I | I | N | V | F | H | Q | Y | S | V | R | V | G | H | P | D | T | L | S | K | G | E | L | K | Q | L | I | Q | K | E | L | P | N | F | L | K | N | A | K | K | D | P | Q | A | I | D | H | L | F | Q | D | L | D | T | N | Q | D | G | Q | V | S | F | E | E | F | M | V | L | V | A | R | L | T | V | A | S |
|  | M | T | K | L | E | E | H | L | E | G | I | V | N | I | F | H | Q | Y | S | V | R | K | G | H | F | D | T | L | S | K | G | E | L | K | Q | L | L | T | K | E | L | A | N | T | I | K | N | I | - | K | D | K | A | V | I | D | E | I | F | Q | G | L | D | A | N | Q | D | E | Q | V | D | F | Q | E | F | I | S | L | V | A | I | A | L | K | A | A |
|  | L | S | E | L | E | K | A | I | D | V | I | I | D | V | F | H | Q | Y | S | R | R | E | G | D | K | D | T | L | T | R | K | E | L | K | L | L | I | E | K | Q | L | A | N | Y | L | K | H | V | - | K | N | Q | V | S | I | D | Q | I | F | K | D | L | D | N | N | K | D | Q | Q | L | S | F | G | E | V | M | L | L | I | I | R | V | T | V | A | T |
|  | M | S | E | L | E | K | A | I | E | T | I | I | N | V | F | H | Q | Y | S | V | R | V | G | H | P | D | T | L | S | K | K | E | L | K | Q | L | I | Q | K | E | L | P | N | F | L | K | N | A | - | K | D | P | A | T | I | D | N | L | F | Q | E | L | D | K | N | K | D | G | Q | I | S | F | E | E | F | M | V | L | V | A | R | V | T | V | A | C |
|  | M | S | Q | L | E | K | S | I | E | T | I | I | N | V | F | H | Q | Y | S | V | R | V | G | H | P | D | T | L | S | K | G | E | L | K | Q | L | I | Q | K | E | L | P | N | F | L | K | N | A | - | K | D | P | A | T | I | D | N | L | F | Q | D | L | D | T | N | K | D | G | Q | V | S | F | E | E | F | M | V | L | V | A | R | V | T | V | A | S |

90
