# Supplementary material for: Evolution of multifunctionality through a pleiotropic substitution in the innate immune protein S100A9
Source: eLife journal article supplement (doi:10.7554/elife.54100), 2020-04-07
Supplement: supp [file elife-54100-supp-v1.zip]

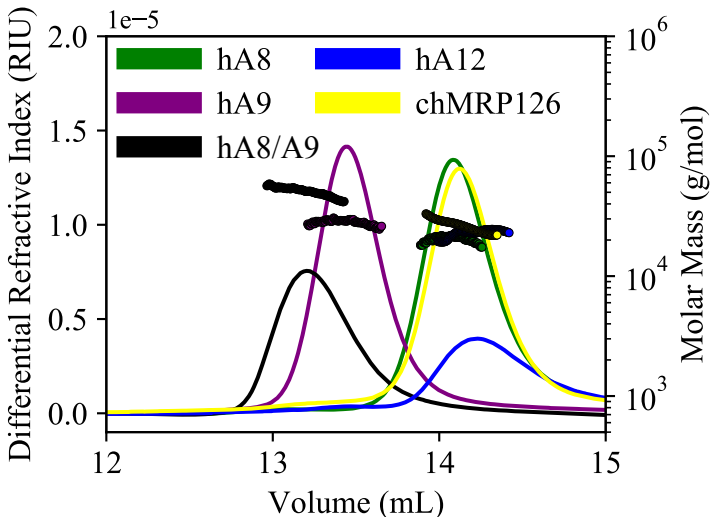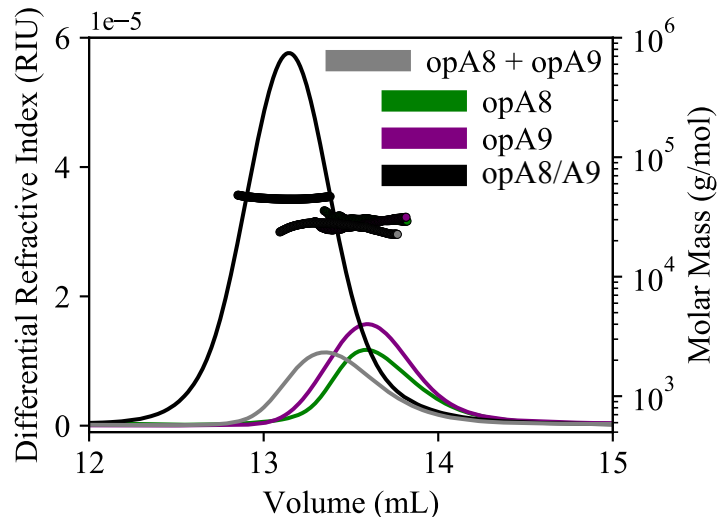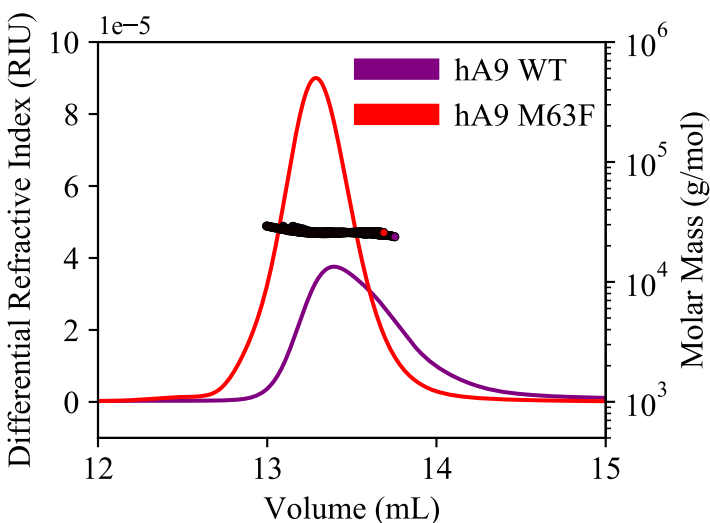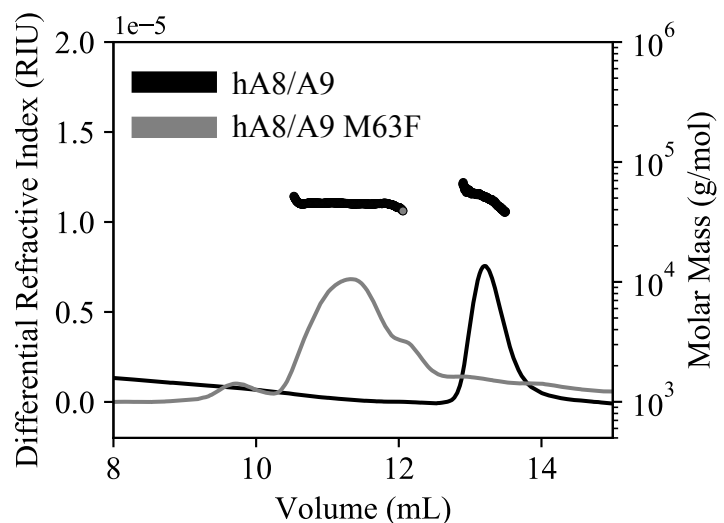

| Protein            | Mw<br>(kDa) | Error  | Polydispersity<br>(Mw/Mn) | Error  | Mass<br>fraction (%) |
|--------------------|-------------|--------|---------------------------|--------|----------------------|
| <b>hA9</b>         | 26.5        | 2.00%  | 1.004                     | 2.74%  | 96.5                 |
| <b>hA9 M63F</b>    | 27.1        | 8.20%  | 1.058                     | 9.24%  | 90                   |
| <b>hA8/A9</b>      | 47.8        | 4.80%  | 1.046                     | 7.28%  | 94.6                 |
| <b>hA8/A9 M63F</b> | 48.7        | 8.70%  | 1.049                     | 9.77%  | 88.7                 |
| <b>hA8</b>         | 18.5        | 7.40%  | 1.073                     | 10.60% | 89.6                 |
| <b>hA9</b>         | 27.4        | 6.10%  | 1.061                     | 7.42%  | 91.6                 |
| <b>chMRP126</b>    | 28.1        | 15.60% | 1.056                     | 18.97% | 84.9                 |
| <b>hA12</b>        | 23.5        | 14.20% | 1.031                     | 19.19% | 80.2                 |
| <b>opA8</b>        | 31.7        | 9.3%   | 1.017                     | 12.25% | 87.5                 |
| <b>opA9</b>        | 29.7        | 7.6%   | 1.019                     | 10.41% | 91.9                 |
| <b>opA8/A9</b>     | 46.8        | 1.4%   | 1.003                     | 1.93%  | 92.6                 |
| <b>opA8 + opA9</b> | 25.7        | 9.6%   | 1.012                     | 14.01% | 93.2                 |
