# Supplementary material for: Evolution of multifunctionality through a pleiotropic substitution in the innate immune protein S100A9
Source: eLife journal article supplement (doi:10.7554/elife.54100), 2020-04-07
Supplement: supp [file elife-54100-supp-v1.zip]

**Table S1. Statistics for ancestrally reconstructed proteins.**

| <b>Ancestrally<br/>reconstructed protein</b> | <b>Average<br/>posterior<br/>probability</b> | <b># of sites that differ<br/>from the ML<br/>sequence</b> | <b>Average # sites that<br/>differ from ML<br/>sequence for<br/>reconstructions on<br/>alternate topologies</b> |
|----------------------------------------------|----------------------------------------------|------------------------------------------------------------|-----------------------------------------------------------------------------------------------------------------|
| ancA9                                        | 0.83                                         | --                                                         | 5                                                                                                               |
| altancA9                                     | 0.81                                         | 10                                                         | --                                                                                                              |
| ancA8                                        | 0.88                                         | --                                                         | 1                                                                                                               |
| altancA8                                     | 0.86                                         | 17                                                         | --                                                                                                              |
| ancCG                                        | 0.86                                         | --                                                         | 8                                                                                                               |
| altancCG                                     | 0.84                                         | 8                                                          | --                                                                                                              |
