# Supplementary material for: Evolution of multifunctionality through a pleiotropic substitution in the innate immune protein S100A9
Source: eLife journal article supplement (doi:10.7554/elife.54100), 2020-04-07
Supplement: supp [file elife-54100-supp-v1.zip]

Archive with 32 entries (32 files):
- elife_poa_e54100_Figure_1_figure_supplement_2.pdf
- elife_poa_e54100_Figure_4_source_data_1.xlsx
- elife_poa_e54100_Figure_5_source_data_3.xlsx
- elife_poa_e54100_Figure_6_source_data_1.xlsx
- elife_poa_e54100_Figure_2_figure_supplement_2.pdf
- elife_poa_e54100_Supplementary_file_1.docx
- elife_poa_e54100_Transparent_Reporting_File.docx
- elife_poa_e54100_Figure_4_source_data_2.xlsx
- elife_poa_e54100_Figure_2_source_data_2.xlsx
- elife_poa_e54100_Figure_1_figure_supplement_3.pdf
- elife_poa_e54100_Figure_1_source_data_1.xlsx
- elife_poa_e54100_Figure_4_source_data_3.xlsx
- elife_poa_e54100_Figure_2_figure_supplement_1.pdf
- elife_poa_e54100_Figure_3_source_data_1.xlsx
- elife_poa_e54100_Figure_4_figure_supplement_1.pdf
- elife_poa_e54100_Figure_5_source_data_1.xlsx
- elife_poa_e54100_Figure_5_source_data_2.xlsx
- elife_poa_e54100_Figure_1_figure_supplement_5.pdf
- elife_poa_e54100_Figure_1_figure_supplement_1.pdf
- elife_poa_e54100_Figure_3_figure_supplement_3.pdf
- elife_poa_e54100_Figure_1_figure_supplement_4.pdf
- elife_poa_e54100_Figure_3_figure_supplement_1.pdf
- elife_poa_e54100_Figure_1_source_data_2.xlsx
- elife_poa_e54100_Figure_5_figure_supplement_1.pdf
- elife_poa_e54100_Figure_5_figure_supplement_2.pdf
- elife_poa_e54100_Figure_3_figure_supplement_4.pdf
- elife_poa_e54100_Figure_3_figure_supplement_2.pdf
- elife_poa_e54100_Figure_6_source_data_2.xlsx
- elife_poa_e54100_Figure_4_figure_supplement_2.pdf
- elife_poa_e54100_Figure_4_source_data_4.xlsx
- elife_poa_e54100_Supplementary_file_2.docx
- elife_poa_e54100_Figure_2_figure_supplement_3.pdf
