# Supplementary material for: Evolution of multifunctionality through a pleiotropic substitution in the innate immune protein S100A9
Source: eLife journal article supplement (doi:10.7554/elife.54100), 2020-04-07
Supplement: supp [file elife-54100-supp-v1.zip › elife_poa_e54100_Figure_4_source_data_2.xlsx]

## Sheet: Figure 3 - source data 1
	timepoint	value	protein
0	0	1	hA8
1	1	0.752374	hA8
2	2	0.688845	hA8
3	5	0.451905	hA8
4	30	0.128184	hA8
5	0	1	hA8
6	1	0.457467	hA8
7	2	0.207762	hA8
8	5	0.0834483	hA8
9	30	0.0304181	hA8
10	0	1	hA8
11	1	1.04921	hA8
12	2	0.618699	hA8
13	5	0.211547	hA8
14	30	0.154181	hA8
15	0	1	mA8
16	1	0.625177	mA8
17	2	0.481476	mA8
18	5	0.371917	mA8
19	30	0.115145	mA8
20	0	1	mA8
21	1	0.118571	mA8
22	2	-0.0307118	mA8
23	5	0.00937723	mA8
24	30	-0.0292345	mA8
25	0	1	mA8
26	1	0.0317751	mA8
27	2	-0.0334886	mA8
28	5	-0.0301058	mA8
29	30	-0.070067	mA8
30	0	1	mA8
31	1	0.624344	mA8
32	2	0.389204	mA8
33	5	0.0686331	mA8
34	30	-0.0118509	mA8
35	0	1	opA8
36	1	0.570711	opA8
37	2	0.335997	opA8
38	5	0.205437	opA8
39	30	-0.0325506	opA8
40	0	1	opA8
41	1	0.657832	opA8
42	2	0.377322	opA8
43	5	0.215835	opA8
44	30	0.0589551	opA8
45	0	1	opA8
46	1	0.724229	opA8
47	2	0.523266	opA8
48	5	0.260634	opA8
49	30	0.149415	opA8
50	0	1	opA8
51	1	0.735037	opA8
52	2	0.496699	opA8
53	5	0.243774	opA8
54	30	0.114593	opA8
55	0	1	ancA8
56	1	0.877628	ancA8
57	2	0.609943	ancA8
58	5	0.336177	ancA8
59	30	0.127532	ancA8
60	0	1	ancA8
61	1	0.777717	ancA8
62	2	0.491702	ancA8
63	5	0.348461	ancA8
64	30	0.0292746	ancA8
65	0	1	altancA8
66	5	0.986281	altancA8
67	30	0.968659	altancA8
68	0	1	altancA8
69	5	0.820403	altancA8
70	30	0.822927	altancA8
71	0	1	hA9
72	1	0.646956	hA9
73	2	0.466872	hA9
74	5	0.239119	hA9
75	30	0.0697971	hA9
76	0	1	hA9
77	1	0.530701	hA9
78	2	0.261905	hA9
79	5	0.0563126	hA9
80	30	0.0629276	hA9
81	0	1	hA9
82	1	0.574695	hA9
83	2	0.341723	hA9
84	5	0.210581	hA9
85	30	0.0349533	hA9
86	0	1	hA9
87	1	1.12137	hA9
88	2	0.830738	hA9
89	5	0.657493	hA9
90	30	0.296665	hA9
91	0	1	hA9
92	1	1.12724	hA9
93	2	1.29198	hA9
94	5	0.820284	hA9
95	30	0.431598	hA9
96	0	1	hA9M63F
97	1	1.26427	hA9M63F
98	2	1.19528	hA9M63F
99	5	0.90604	hA9M63F
100	30	0.931936	hA9M63F
101	0	1	hA9M63F
102	1	1.04818	hA9M63F
103	2	1.05225	hA9M63F
104	5	0.919672	hA9M63F
105	30	0.861703	hA9M63F
106	0	1	hA9M63F
107	1	1.12116	hA9M63F
108	3	1.22849	hA9M63F
109	5	1.38477	hA9M63F
110	15	1.2367	hA9M63F
111	30	1.11933	hA9M63F
112	0	1	hA9M63F
113	120	0.712854	hA9M63F
114	960	0.241539	hA9M63F
115	0	1	hA9M63F
116	120	0.704661	hA9M63F
117	240	0.525886	hA9M63F
118	360	0.395703	hA9M63F
119	480	0.271589	hA9M63F
120	0	1	hA9M63A
121	1	0.639675	hA9M63A
122	2	0.397118	hA9M63A
123	5	0.183812	hA9M63A
124	30	0.0447628	hA9M63A
125	0	1	hA9M63A
126	1	0.43641	hA9M63A
127	2	0.200449	hA9M63A
128	5	0.13629	hA9M63A
129	30	0.0680353	hA9M63A
130	0	1	hA9M63A
131	1	0.656339	hA9M63A
132	2	0.543352	hA9M63A
133	5	0.168338	hA9M63A
134	30	0.181323	hA9M63A
135	0	1	mA9
136	1	0.366667	mA9
137	2	0.230562	mA9
138	5	0.0722677	mA9
139	30	0.063925	mA9
140	0	1	mA9
141	1	0.488164	mA9
142	2	0.353969	mA9
143	5	0.000768057	mA9
144	30	0.0325245	mA9
145	0	1	mA9
146	1	0.0780606	mA9
147	2	0.044931	mA9
148	5	0.0439819	mA9
149	30	0.0646835	mA9
150	0	1	mA9
151	1	0.199881	mA9
152	2	0.0943785	mA9
153	5	0.0764447	mA9
154	30	0.0135422	mA9
155	0	1	opA9
156	1	0.194892	opA9
157	2	0.158402	opA9
158	5	0.0284618	opA9
159	30	0.0308736	opA9
160	0	1	opA9
161	1	0.293797	opA9
162	2	0.205593	opA9
163	5	0.0344689	opA9
164	30	0.00369805	opA9
165	0	1	opA9
166	5	0.164961	opA9
167	30	0.117158	opA9
168	60	0.0140481	opA9
169	120	0.0800993	opA9
170	0	1	opA9
171	5	0.0841355	opA9
172	30	0.0440212	opA9
173	60	0.0196587	opA9
174	120	0.0487331	opA9
175	0	1	ancA9
176	1	0.966553	ancA9
177	2	0.874584	ancA9
178	5	0.185697	ancA9
179	30	0.147991	ancA9
180	0	1	ancA9
181	1	0.775762	ancA9
182	2	0.768522	ancA9
183	5	0.683747	ancA9
184	30	0.116867	ancA9
185	0	1	ancA9
186	1	1.21397	ancA9
187	2	0.674911	ancA9
188	5	0.617846	ancA9
189	30	0.473544	ancA9
190	0	1	ancA9M59F
191	1	0.913513	ancA9M59F
192	2	0.882165	ancA9M59F
193	5	0.868096	ancA9M59F
194	30	0.748092	ancA9M59F
195	0	1	ancA9M59F
196	1	1.18649	ancA9M59F
197	2	0.907866	ancA9M59F
198	5	0.701353	ancA9M59F
199	30	0.756195	ancA9M59F
200	0	1	ancA9M59F
201	5	1.17676	ancA9M59F
202	30	1.2003	ancA9M59F
203	60	1.23746	ancA9M59F
204	120	0.987079	ancA9M59F
205	0	1	ancA9M59F
206	5	0.806385	ancA9M59F
207	30	0.975039	ancA9M59F
208	60	0.943691	ancA9M59F
209	120	0.765701	ancA9M59F
210	0	1	altancA9
211	5	1.13279	altancA9
212	30	1.10799	altancA9
213	0	1	altancA9
214	5	0.940365	altancA9
215	30	0.809534	altancA9
216	0	1	altancA9
217	5	1.08944	altancA9
218	30	0.878723	altancA9
219	60	0.746211	altancA9
220	120	0.802429	altancA9
221	0	1	altancA9
222	5	1.17796	altancA9
223	30	1.03685	altancA9
224	60	0.964449	altancA9
225	120	0.963941	altancA9
226	0	1	hCP
227	1	0.856764	hCP
228	0	1	hCP
229	1	1.09939	hCP
230	2	1.13592	hCP
231	5	1.14329	hCP
232	30	0.846571	hCP
233	2	0.817731	hCP
234	5	0.858542	hCP
235	30	0.862817	hCP
236	0	1	hCP
237	1	0.99446	hCP
238	2	0.962552	hCP
239	5	0.916599	hCP
240	30	1.17004	hCP
241	0	1	hCP
242	1	0.856764	hCP
243	0	1	hCP
244	1	1.00802	hCP
245	2	1.05217	hCP
246	5	0.959959	hCP
247	30	0.520553	hCP
248	2	0.817731	hCP
249	5	0.858542	hCP
250	30	0.862817	hCP
251	0	1	hCP
252	1	1.14662	hCP
253	2	1.06823	hCP
254	5	1.22792	hCP
255	30	1.33811	hCP
256	0	1	hCP
257	60	0.857991	hCP
258	300	0.946062	hCP
259	360	0.891532	hCP
260	180	0.791916	hCP
261	240	0.779739	hCP
262	300	0.744181	hCP
263	360	0.604697	hCP
264	0	1	hCP
265	60	1.03603	hCP
266	180	0.979548	hCP
267	240	0.943527	hCP
268	0	1	hCPM63F
269	1	1.07931	hCPM63F
270	2	0.998727	hCPM63F
271	5	0.824834	hCPM63F
272	30	0.895252	hCPM63F
273	0	1	hCPM63F
274	1	1.15225	hCPM63F
275	2	1.1952	hCPM63F
276	5	1.06194	hCPM63F
277	30	1.17764	hCPM63F
278	0	1	hCPM63F
279	1	1.07697	hCPM63F
280	2	1.13183	hCPM63F
281	5	1.08579	hCPM63F
282	30	0.905384	hCPM63F
283	0	1	mcp
284	1	0.976762	mcp
285	2	0.958131	mcp
286	5	0.949119	mcp
287	30	0.75814	mcp
288	0	1	mcp
289	1	0.924784	mcp
290	2	0.88673	mcp
291	5	0.844477	mcp
292	30	0.732956	mcp
293	0	1	mcp
294	1	1.04203	mcp
295	2	1.00144	mcp
296	5	1.02392	mcp
297	30	1.00175	mcp
298	0	1	mcp
299	1	1.18088	mcp
300	2	1.21861	mcp
301	5	1.10474	mcp
302	30	1.05261	mcp
303	0	1	opCP
304	1	0.76335	opCP
305	0	1	opCP
306	1	0.916403	opCP
307	2	0.930649	opCP
308	5	0.899793	opCP
309	30	0.874207	opCP
310	0	1	opCP
311	1	0.755935	opCP
312	2	0.806508	opCP
313	5	0.763508	opCP
314	30	0.714244	opCP
315	2	0.682639	opCP
316	5	0.720896	opCP
317	30	0.619619	opCP
318	0	1	opCP
319	1	0.805069	opCP
320	2	0.819707	opCP
321	5	0.819166	opCP
322	30	0.632118	opCP
323	0	1	opCP
324	60	0.654966	opCP
325	300	0.75605	opCP
326	360	0.79997	opCP
327	180	0.560648	opCP
328	240	0.552036	opCP
329	300	0.471417	opCP
330	360	0.383854	opCP
331	0	1	opCP
332	60	0.764082	opCP
333	180	0.684738	opCP
334	240	0.756931	opCP
335	0	1	ancCP
336	1	0.888228	ancCP
337	2	0.750668	ancCP
338	5	0.555214	ancCP
339	30	0.225267	ancCP
340	0	1	ancCP
341	1	1.36378	ancCP
342	2	1.02859	ancCP
343	5	0.912492	ancCP
344	30	0.688302	ancCP
345	0	1	ancCP
346	5	1.12433	ancCP
347	30	0.91435	ancCP
348	60	0.919867	ancCP
349	120	0.848518	ancCP
350	0	1	ancCP
351	5	1.13412	ancCP
352	30	1.21658	ancCP
353	60	1.26573	ancCP
354	120	1.00705	ancCP
355	0	1	altancCP
356	1	1.03311	altancCP
357	2	1.09748	altancCP
358	5	1.07705	altancCP
359	30	0.854846	altancCP
360	0	1	altancCP
361	1	0.915271	altancCP
362	2	0.963549	altancCP
363	5	1.03134	altancCP
364	30	0.61966	altancCP
365	0	1	altancCP
366	5	1.05937	altancCP
367	30	0.874552	altancCP
368	60	0.995806	altancCP
369	120	0.854952	altancCP
370	0	1	altancCP
371	5	1.10499	altancCP
372	30	0.871472	altancCP
373	60	0.887047	altancCP
374	120	0.894709	altancCP
375	0	1	hA12
376	5	0.635215	hA12
377	30	0.504872	hA12
378	0	1	hA12
379	5	0.801786	hA12
380	30	0.619901	hA12
381	0	1	hA12
382	1	0.865482	hA12
383	2	0.847318	hA12
384	5	0.764048	hA12
385	30	0.561982	hA12
386	0	1	hA12
387	1	0.808176	hA12
388	2	0.858448	hA12
389	5	0.860631	hA12
390	30	0.693393	hA12
391	0	1	chMRP126
392	1	1.05236	chMRP126
393	2	1.08681	chMRP126
394	5	0.975467	chMRP126
395	30	0.78223	chMRP126
396	0	1	chMRP126
397	1	0.972377	chMRP126
398	2	1.03399	chMRP126
399	5	0.982794	chMRP126
400	30	0.805201	chMRP126
401	0	1	chMRP126
402	1	1.22535	chMRP126
403	2	1.22509	chMRP126
404	5	1.05995	chMRP126
405	30	0.990784	chMRP126
406	0	1	chMRP126
407	1	1.1544	chMRP126
408	2	1.0734	chMRP126
409	5	0.98187	chMRP126
410	30	0.86882	chMRP126
411	0	1	chMRP126
412	1	0.880977	chMRP126
413	2	0.832825	chMRP126
414	5	0.678935	chMRP126
415	30	0.621728	chMRP126
416	0	1	chMRP126
417	1	0.83908	chMRP126
418	2	0.709423	chMRP126
419	5	0.840062	chMRP126
420	30	0.746259	chMRP126
421	0	1	ancCG
422	1	0.996663	ancCG
423	2	0.991601	ancCG
424	5	1.09354	ancCG
425	30	0.997928	ancCG
426	0	1	ancCG
427	1	0.83446	ancCG
428	2	0.892779	ancCG
429	5	0.986274	ancCG
430	30	0.819001	ancCG
431	0	1	ancCG
432	10	1.02889	ancCG
433	30	0.991606	ancCG
434	60	0.947239	ancCG
435	120	0.995099	ancCG
436	0	1	ancCG
437	10	0.904799	ancCG
438	30	0.92959	ancCG
439	60	0.862926	ancCG
440	120	0.981188	ancCG
441	0	1	ancCGF59M
442	10	1.06089	ancCGF59M
443	30	1.04161	ancCGF59M
444	60	0.977784	ancCGF59M
445	120	0.994547	ancCGF59M
446	0	1	ancCGF59M
447	10	1.06314	ancCGF59M
448	30	1.02751	ancCGF59M
449	60	0.969056	ancCGF59M
450	120	0.984555	ancCGF59M
451	0	1	ancCGF59M
452	10	1.13873	ancCGF59M
453	30	1.10729	ancCGF59M
454	60	1.15689	ancCGF59M
455	120	1.11302	ancCGF59M
456	0	1	altancCG
457	1	1.0136	altancCG
458	2	0.936833	altancCG
459	5	0.933186	altancCG
460	30	0.929028	altancCG
461	0	1	altancCG
462	1	1.07464	altancCG
463	2	1.08911	altancCG
464	5	1.09385	altancCG
465	30	1.05268	altancCG
466	0	1	altancCG
467	5	0.98932	altancCG
468	30	0.970456	altancCG
469	60	1.04541	altancCG
470	120	1.00139	altancCG
471	0	1	altancCG
472	5	0.966096	altancCG
473	30	0.929286	altancCG
474	60	0.988724	altancCG
475	120	0.940685	altancCG
