# Supplementary material for: Evolution of multifunctionality through a pleiotropic substitution in the innate immune protein S100A9
Source: eLife journal article supplement (doi:10.7554/elife.54100), 2020-04-07
Supplement: supp [file elife-54100-supp-v1.zip › elife_poa_e54100_Figure_4_source_data_3.xlsx]

## Sheet: antimicrobial_activity_data_eLi
Concentration (uM)	Protein	date	timepoint (hours)	OD600 (average of technical triplicates)
0	S. epi alone	180606	7	0.446267
2.5	hA8/A9	180606	7	0.308967
5	hA8/A9	180606	7	0.317667
7.5	hA8/A9	180606	7	0.284733
10	hA8/A9	180606	7	0.0827667
2.5	hA8/A9 M63F	180606	7	0.298533
5	hA8/A9 M63F	180606	7	0.271167
7.5	hA8/A9 M63F	180606	7	0.232967
0	S. epi alone	170405	7	0.457767
2.5	hA8/A9	170405	7	0.3571
5	hA8/A9	170405	7	0.252767
2.5	opA8/A9	170405	7	0.386767
5	opA8/A9	170405	7	0.187533
0	S. epi alone	180901	7	0.6801
7.5	opA8/A9	180901	7	0.533333
10	opA8/A9	180901	7	0.4319
2.5	opA8/A9	180901	7	0.6421
5	opA8/A9	180901	7	0.639033
7.5	opA8/A9	180901	7	0.424367
10	opA8/A9	180901	7	0.379467
0	S. epi alone	180829	7	0.684433
2.5	opA8/A9	180829	7	0.685033
5	opA8/A9	180829	7	0.686833
7.5	opA8/A9	180829	7	0.647167
10	opA8/A9	180829	7	0.418833
7.5	hA9	180829	7	0.688533
10	hA9	180829	7	0.687533
7.5	hA8	180829	7	0.650933
10	hA8	180829	7	0.645333
2.5	hA9 M63F	180829	7	0.667133
5	hA9 M63F	180829	7	0.512567
7.5	hA9 M63F	180829	7	0.6062
10	hA9 M63F	180829	7	0.665233
0	S. epi alone	191118	7	0.6016
10	ancA8/A9	191118	7	0.210767
2.5	altancA8/A9	191118	7	0.653767
5	altancA8/A9	191118	7	0.506867
7.5	altancA8/A9	191118	7	0.4434
10	altancA8/A9	191118	7	0.4592
0	S. epi alone	170507	7	0.2937
2.5	hA8	170507	7	0.304967
5	hA8	170507	7	0.327933
7.5	hA8	170507	7	0.364533
2.5	hA9	170507	7	0.310567
5	hA9	170507	7	0.220433
7.5	hA9	170507	7	0.229667
7.5	hA8/A9	170507	7	0.1644
0	S. epi alone	180622	7	0.599433
2.5	hA8/A9	180622	7	0.184367
5	hA8/A9	180622	7	0.156933
7.5	hA8/A9	180622	7	0.135
10	hA8/A9	180622	7	0.0854667
2.5	hA8/A9 M63F	180622	7	0.635133
5	hA8/A9 M63F	180622	7	0.367733
7.5	hA8/A9 M63F	180622	7	0.3156
10	hA8/A9 M63F	180622	7	0.443033
0	S. epi alone	170405	7	0.271067
10	hA8/A9	170405	7	0.1362
10	mA8/A9	170405	7	0.277867
10	opA8/A9	170405	7	0.025
0	S. epi alone	180324	7	0.541933
2.5	hA9	180324	7	0.5451
5	hA9	180324	7	0.603533
2.5	hA8/A9	180324	7	0.165333
5	hA8/A9	180324	7	0.0284333
10	hA8/A9	180324	7	0.238233
0	S. epi alone	180703	7	0.712233
2.5	hA8/A9	180703	7	0.1989
5	hA8/A9	180703	7	0.174567
7.5	hA8/A9	180703	7	0.0128
10	hA8/A9	180703	7	0.110567
2.5	hA8/A9 M63F	180703	7	0.694533
5	hA8/A9 M63F	180703	7	0.349633
7.5	hA8/A9 M63F	180703	7	0.3138
10	hA8/A9 M63F	180703	7	0.257433
2.5	hA8/A9	180703	7	0.138467
5	hA8/A9	180703	7	0.0589667
7.5	hA8/A9	180703	7	0.0337
10	hA8/A9	180703	7	0.0258333
0	S. epi alone	180831	7	0.67
2.5	opA8/A9	180831	7	0.729
5	opA8/A9	180831	7	0.702967
7.5	opA8/A9	180831	7	0.434233
10	opA8/A9	180831	7	0.550567
0	S. epi alone	191115	7	0.5848
2.5	ancA8/A9	191115	7	0.681067
5	ancA8/A9	191115	7	0.373167
7.5	ancA8/A9	191115	7	0.212167
2.5	ancA8/A9	191115	7	0.6525
5	ancA8/A9	191115	7	0.5865
2.5	altancA8/A9	191115	7	0.587667
5	altancA8/A9	191115	7	0.502267
7.5	altancA8/A9	191115	7	0.408833
10	altancA8/A9	191115	7	0.4956
0	S. epi alone	180824	7	0.713567
2.5	hA8	180824	7	0.656367
5	hA8	180824	7	0.733633
7.5	hA8	180824	7	0.443933
10	hA8	180824	7	0.747667
2.5	hA9	180824	7	0.729167
5	hA9	180824	7	0.697633
7.5	hA9	180824	7	0.709433
10	hA9	180824	7	0.761667
2.5	hA8/A9	180824	7	0.148733
5	hA8/A9	180824	7	0.115467
7.5	hA8/A9	180824	7	0.120667
10	hA8/A9	180824	7	0.124567
2.5	hA8/A9 M63F	180824	7	0.284833
5	hA8/A9 M63F	180824	7	0.144633
7.5	hA8/A9 M63F	180824	7	0.156
10	hA8/A9 M63F	180824	7	0.157
2.5	hA9 M63F	180824	7	0.6481
5	hA9 M63F	180824	7	0.752567
7.5	hA9 M63F	180824	7	0.747233
10	hA9 M63F	180824	7	0.769133
0	S. epi alone	180314	7	0.734633
5	hA8/A9	180314	7	0.617033
2.5	ancA8/A9	180314	7	0.5096
5	ancA8/A9	180314	7	0.289033
10	ancA8/A9	180314	7	0.3476
2.5	altancA8/A9	180314	7	0.4219
5	altancA8/A9	180314	7	0.441067
10	altancA8/A9	180314	7	0.451333
