# Supplementary material for: Evolution of multifunctionality through a pleiotropic substitution in the innate immune protein S100A9
Source: eLife journal article supplement (doi:10.7554/elife.54100), 2020-04-07
Supplement: supp [file elife-54100-supp-v1.zip › elife_poa_e54100_Figure_4_source_data_4.xlsx]

## Sheet: opossum_tlr4
	Concentration (uM)	PB	average	label	raw_lps	sample	tag	well1	well2	well3
0			1	D1	36.3727	LPS	190927	1.27012	0.777276	0.952605
1			2.89121e-19	D4	36.3727	LPS + PB	190927	0.0174122	-0.0133944	-0.00401779
2	2	+	0.636211	D7	36.3727	hA9	190927	0.677118	0.570488	0.661026
3	2	++	0.587206	D10	36.3727	hA9	190927	0.731269	0.523389	0.506959
4	2	+	0.154182	E1	36.3727	opA9	190927	0.159407	0.171709	0.131429
5	2	++	0.138569	E4	36.3727	opA9	190927	0.154693	0.120322	0.140693
6	2	+	0.2431	E7	36.3727	altancA9	190927	0.255203	0.260377	0.21372
7	2	++	0.232643	E10	36.3727	altancA9	190927	0.212355	0.298079	0.187495
8	2	+	0.0565614	F1	36.3727	altancCG	190927	0.103234	0.0332953	0.0331545
9	2	++	0.0497979	F4	36.3727	altancCG	190927	0.0599851	0.0599176	0.0294912
10			1	D1	32.8228	LPS	190926	1.16649	0.824602	1.00891
11			5.78241e-18	D4	32.8228	LPS + PB	190926	0.0221132	-0.00136149	-0.0207517
12	4	-	0.707867	E1	32.8228	altancA9	190926	0.729287	0.874054	0.520259
13	4	+	0.370362	E4	32.8228	altancA9	190926	0.443562	0.336977	0.330547
14	4	++	0.425172	E7	32.8228	altancA9	190926	0.359984	0.588856	0.326676
15	2	+	0.223247	E10	32.8228	altancA9	190926	0.282329	0.200273	0.187139
16	0.4	+	0.0690503	F1	32.8228	altancA9	190926	0.0879516	0.0663676	0.0528318
17	0.08	+	0.0411355	F4	32.8228	altancA9	190926	0.0535585	0.035349	0.034499
18	4	-	0.235133	F7	32.8228	altancCG	190926	0.209874	0.265709	0.229816
19	4	+	0.109431	F10	32.8228	altancCG	190926	0.136064	0.102146	0.0900816
20	4	++	0.125953	G1	32.8228	altancCG	190926	0.132489	0.124003	0.121367
21	2	+	0.0646238	G4	32.8228	altancCG	190926	0.110738	0.054404	0.0287298
22	0.4	+	0.0203203	G7	32.8228	altancCG	190926	0.0424874	0.02999	-0.0115164
23	0.08	+	0.0136274	G10	32.8228	altancCG	190926	-0.00236735	-0.00547447	0.0487241
24			1	D1	32.8228	LPS	190926	1.16649	0.824602	1.00891
25			5.78241e-18	D4	32.8228	LPS + PB	190926	0.0221132	-0.00136149	-0.0207517
26	2	+	0.194769	D7	32.8228	opA9	190926	0.221298	0.183811	0.179197
27	2	++	0.226755	D10	32.8228	opA9	190926	0.300208	0.199854	0.180202
28	2	+	0.535269	H1	32.8228	hA9	190926	0.470847	0.485624	0.649335
29	2	++	0.523882	H4	32.8228	hA9	190926	0.64303	0.585492	0.343122
30			1	G1	31.7758	LPS	190923	0.908042	0.933129	1.15883
31			-1.07697e-17	G4	31.7758	LPS + PB	190923	0.0158999	-0.0175577	0.00165784
32	2	+	0.195772	G7	31.7758	opA9	190923	0.21885	0.188571	0.179893
33	2	++	0.261868	G10	31.7758	opA9	190923	0.314128	0.239264	0.232213
34	2	+	0.210376	H1	31.7758	altancA9	190923	0.262416	0.219687	0.149025
35	2	++	0.272062	H4	31.7758	altancA9	190923	0.239257	0.278213	0.298718
36	2	+	0.0518655	H7	31.7758	altancCG	190923	0.0773322	0.0763834	0.00188103
37	2	++	0.0585309	H10	31.7758	altancCG	190923	0.0851279	0.0619572	0.0285078
38			1	F1	39.1469	LPS	190914	1.14335	1.01071	0.845947
39			1.73472e-17	F4	39.1469	LPS + PB	190914	0.0249851	-0.0149174	-0.0100677
40	2	+	0.195249	F7	39.1469	ancA9	190914	0.243081	0.171093	0.171571
41	2	++	0.207054	F10	39.1469	ancA9	190914	0.207212	0.23528	0.178671
42	2	+	0.260916	G1	39.1469	ancA9 M59F	190914	0.252937	0.261489	0.268323
43	2	++	0.235055	G4	39.1469	ancA9 M59F	190914	0.345611	0.181963	0.177591
44	2	+	0.0666747	G7	39.1469	ancCG	190914	0.0968183	0.0549928	0.0482128
45	2	++	0.0317502	G10	39.1469	ancCG	190914	0.0364934	0.0302024	0.0285548
46	2	+	0.238205	H1	39.1469	ancCG F59M	190914	0.284647	0.232986	0.196982
47	2	++	0.198387	H4	39.1469	ancCG F59M	190914	0.258178	0.229105	0.107879
48			1	A1	57.6366	LPS	190913	0.962736	0.876256	1.16101
49			3.18033e-18	A4	57.6366	LPS + PB	190913	-0.00125465	0.00904242	-0.00778777
50	4	-	0.595021	A7	57.6366	ancA9	190913	0.602554	0.553755	0.628754
51	4	+	0.37779	A10	57.6366	ancA9	190913	0.44871	0.324523	0.360137
52	4	++	0.387262	B1	57.6366	ancA9	190913	0.380237	0.513112	0.268436
53	2	+	0.249943	B4	57.6366	ancA9	190913	0.292588	0.231419	0.225822
54	0.4	+	0.0836442	B7	57.6366	ancA9	190913	0.0924058	0.0912692	0.0672576
55	0.08	+	0.0517519	B10	57.6366	ancA9	190913	0.0733983	0.0238945	0.0579629
56	4	-	0.760734	C1	57.6366	ancA9 M59F	190913	0.914011	0.495294	0.872895
57	4	+	0.503729	C4	57.6366	ancA9 M59F	190913	0.598675	0.458204	0.454308
58	4	++	0.576081	C7	57.6366	ancA9 M59F	190913	0.60102	0.592188	0.535034
59	2	+	0.322818	C10	57.6366	ancA9 M59F	190913	0.319902	0.295469	0.353083
60	0.4	+	0.126997	D1	57.6366	ancA9 M59F	190913	0.10683	0.16255	0.111611
61	0.08	+	0.0678486	D4	57.6366	ancA9 M59F	190913	0.113087	0.074684	0.0157744
62	4	-	0.386883	D7	57.6366	ancCG	190913	0.431081	0.2805	0.449068
63	4	+	0.178607	D10	57.6366	ancCG	190913	0.215069	0.226128	0.0946232
64	4	++	0.184034	E1	57.6366	ancCG	190913	0.244293	0.167541	0.140269
65	2	+	0.101757	E4	57.6366	ancCG	190913	0.0973623	0.0822101	0.125699
66	0.4	+	0.0252459	E7	57.6366	ancCG	190913	0.0525881	0.00501047	0.0181391
67	0.08	+	0.0297876	E10	57.6366	ancCG	190913	0.0500547	0.0332981	0.00600994
68	4	-	0.623437	F1	57.6366	ancCG F59M	190913	0.650654	0.742202	0.477456
69	4	+	0.385135	F4	57.6366	ancCG F59M	190913	0.560643	0.338288	0.256475
70	4	++	0.30965	F7	57.6366	ancCG F59M	190913	0.266758	0.36567	0.296523
71	2	+	0.267299	F10	57.6366	ancCG F59M	190913	0.251368	0.284592	0.265937
72	0.4	+	0.0317946	G1	57.6366	ancCG F59M	190913	0.022293	0.0279573	0.0451336
73	0.08	+	0.00445566	G4	57.6366	ancCG F59M	190913	0.0208925	-0.0152349	0.00770942
74			1	A1	51.6423	LPS	190912	1.06326	0.897862	1.03888
75			-6.36065e-18	A4	51.6423	LPS + PB	190912	-0.0167551	0.0105724	0.00618266
76	4	-	0.729504	A7	51.6423	ancA9	190912	0.841347	0.653645	0.69352
77	4	+	0.462884	A10	51.6423	ancA9	190912	0.609134	0.346444	0.433072
78	4	++	0.547669	B1	51.6423	ancA9	190912	0.622731	0.617196	0.403081
79	2	+	0.339853	B4	51.6423	ancA9	190912	0.374873	0.304082	0.340604
80	0.4	+	0.106193	B7	51.6423	ancA9	190912	0.130708	0.0978494	0.0900209
81	0.08	+	0.0722489	B10	51.6423	ancA9	190912	0.10824	0.0318645	0.0766417
82	4	-	0.935798	C1	51.6423	ancA9 M59F	190912	0.970931	0.727561	1.1089
83	4	+	0.614693	C4	51.6423	ancA9 M59F	190912	0.763586	0.59047	0.490024
84	4	++	0.653351	C7	51.6423	ancA9 M59F	190912	0.824152	0.485997	0.649905
85	2	+	0.423225	C10	51.6423	ancA9 M59F	190912	0.432541	0.477	0.360135
86	0.4	+	0.13181	D1	51.6423	ancA9 M59F	190912	0.193746	0.101805	0.0998781
87	0.08	+	0.0402237	D4	51.6423	ancA9 M59F	190912	0.0459582	0.038484	0.036229
88	4	-	0.489456	D7	51.6423	ancCG	190912	0.4738	0.563355	0.431214
89	4	+	0.207945	D10	51.6423	ancCG	190912	0.27215	0.21381	0.137876
90	4	++	0.227971	E1	51.6423	ancCG	190912	0.271294	0.24646	0.166158
91	2	+	0.125457	E4	51.6423	ancCG	190912	0.0893394	0.196597	0.090436
92	0.4	+	0.00176057	E7	51.6423	ancCG	190912	-0.00920217	0.0236714	-0.00918751
93	0.08	+	0.0207812	E10	51.6423	ancCG	190912	0.00834848	-0.0036991	0.0576944
94	4	-	0.668592	F1	51.6423	ancCG F59M	190912	0.800296	0.571233	0.634248
95	4	+	0.43476	F4	51.6423	ancCG F59M	190912	0.550979	0.34017	0.413133
96	4	++	0.402164	F7	51.6423	ancCG F59M	190912	0.432458	0.375232	0.398803
97	2	+	0.239391	F10	51.6423	ancCG F59M	190912	0.29697	0.200066	0.221136
98	0.4	+	0.0807337	G1	51.6423	ancCG F59M	190912	0.0872248	0.0618992	0.0930772
99	0.08	+	0.00800362	G4	51.6423	ancCG F59M	190912	0.0259404	0.0180674	-0.0199969
100			1	E1	46.3375	LPS	190301	0.798156	1.11305	1.08879
101			-7.37257e-18	E4	46.3375	LPS + PB	190301	0.00168216	0.000774111	-0.00245627
102	2	+	0.648163	E7	46.3375	ancA9	190301	0.769995	0.699598	0.474897
103	2	++	0.52101	E10	46.3375	ancA9	190301	0.575914	0.487254	0.499862
104	2	++	0.00145778	F4	46.3375	ancA9 M59F	190301	0.0276671	0.0211845	-0.0444783
105	2	+	0.512719	F7	46.3375	altancA9	190301	0.697279	0.328863	0.512015
106	2	++	0.350581	F10	46.3375	altancA9	190301	0.321387	0.39539	0.334967
107			1	D1	15.2933	LPS	190305	0.726413	0.963102	1.31049
108			0	D4	15.2933	LPS + PB	190305	-0.00376495	-0.028017	0.0317819
109	2	+	0.802691	D7	15.2933	hA9	190305	0.579897	0.907086	0.921091
110	2	++	0.658414	D10	15.2933	hA9	190305	0.707754	0.807325	0.460162
111	2	+	0.608997	E1	15.2933	ancA9	190305	0.692026	0.474126	0.660839
112	2	++	0.582627	E4	15.2933	ancA9	190305	0.449733	0.543351	0.754798
113	2	+	0.411232	E7	15.2933	ancA9 M59F	190305	0.342658	0.546841	0.344198
114	2	++	0.38218	E10	15.2933	ancA9 M59F	190305	0.271335	0.471875	0.403331
115	2	+	0.433945	F1	15.2933	altancA9	190305	0.345166	0.361957	0.594712
116	2	++	0.543403	F4	15.2933	altancA9	190305	0.462016	0.446724	0.721469
117	2	+	-0.10925	F7	15.2933	dummy	190305	-0.146155	0.0955246	-0.277119
118	2	++	-0.206732	F10	15.2933	dummy	190305	-0.16511	-0.300505	-0.15458
119			-0.0362652	A1	24.7282	Buffer	190418	-0.0313222	-0.0270663	-0.0504072
120			-0.0477813	A4	24.7282	PB	190418	-0.0407874	-0.053584	-0.0489726
121			1	A7	24.7282	LPS	190418	0.980941	0.95636	1.0627
122			2.08167e-17	A10	24.7282	LPS + PB	190418	0.015655	-0.0313466	0.0156916
123	5	+	0.600302	B1	24.7282	hA9	190418	0.636534	0.593879	0.570494
124	5	++	0.83877	B4	24.7282	hA9	190418	1.24393	0.598471	0.673906
125	2	+	0.365621	B7	24.7282	hA9	190418	0.410767	0.3308	0.355297
126	0.4	+	0.065946	B10	24.7282	hA9	190418	0.0927718	0.0338541	0.0712121
127	0.08	+	0.0264901	C1	24.7282	hA9	190418	-0.00196646	0.0591721	0.0222646
128	5	+	0.902906	C4	24.7282	opA8	190418	1.00399	0.841093	0.863641
129	5	++	1.00324	C7	24.7282	opA8	190418	1.01769	0.935388	1.05663
130	2	+	0.799134	C10	24.7282	opA8	190418	0.960534	0.705723	0.731145
131	0.4	+	0.340179	D1	24.7282	opA8	190418	0.283102	0.38729	0.350145
132	0.08	+	0.0567306	D4	24.7282	opA8	190418	0.0872412	0.0602626	0.0226882
133	5	+	0.561601	D7	24.7282	opA9	190418	0.588977	0.627544	0.468283
134	5	++	0.514398	D10	24.7282	opA9	190418	0.603615	0.611965	0.327616
135	2	+	0.289974	E1	24.7282	opA9	190418	0.347073	0.247744	0.275104
136	0.4	+	0.0674572	E4	24.7282	opA9	190418	0.0711742	0.0841623	0.047035
137	0.08	+	0.0107266	E7	24.7282	opA9	190418	0.00743265	-0.0136773	0.0384246
138	5	+	0.107348	E10	24.7282	opA9 M60F	190418	0.122916	0.102807	0.0963201
139	5	++	0.0811431	F1	24.7282	opA9 M60F	190418	0.0851817	0.0363762	0.121872
140	2	+	0.100098	F4	24.7282	opA9 M60F	190418	0.137541	0.116229	0.0465244
141	0.4	+	-0.00330134	F7	24.7282	opA9 M60F	190418	0.00380039	-0.0135879	-0.00011648
142	0.08	+	-0.00728419	F10	24.7282	opA9 M60F	190418	0.0128691	-0.0145675	-0.0201542
143	5	+	0.210185	G1	24.7282	ancCG	190418	0.122242	0.241767	0.266546
144	5	++	0.189681	G4	24.7282	ancCG	190418	0.171711	0.241803	0.15553
145	2	+	0.108396	G7	24.7282	ancCG	190418	0.0934584	0.118134	0.113595
146	0.4	+	0.030322	G10	24.7282	ancCG	190418	0.0304258	0.0458941	0.0146459
147	0.08	+	-0.012405	H1	24.7282	ancCG	190418	0.00635148	-0.0436899	0.000123513
148			-0.0643952	A1	26.0837	Buffer	190419	-0.0750207	-0.0653564	-0.0528086
149			-0.0796047	A4	26.0837	PB	190419	-0.0647643	-0.0809206	-0.0931292
150			1	A7	26.0837	LPS	190419	1.04854	1.10757	0.84389
151			-1.38778e-17	A10	26.0837	LPS + PB	190419	0.0103787	0.0181008	-0.0284795
152	5	+	0.83824	B1	26.0837	hA9	190419	0.885524	0.727057	0.902139
153	5	++	0.963952	B4	26.0837	hA9	190419	1.09188	0.900596	0.89938
154	2	+	0.598203	B7	26.0837	hA9	190419	0.75925	0.54586	0.4895
155	0.4	+	0.163282	B10	26.0837	hA9	190419	0.203074	0.162027	0.124747
156	0.08	+	0.0248655	C1	26.0837	hA9	190419	-0.0150082	0.0415898	0.0480148
157	5	+	1.15465	C4	26.0837	opA8	190419	1.38691	1.081	0.996054
158	5	++	1.48219	C7	26.0837	opA8	190419	1.70942	1.58953	1.14763
159	2	+	0.982574	C10	26.0837	opA8	190419	1.14138	1.0476	0.758733
160	0.4	+	0.43732	D1	26.0837	opA8	190419	0.288131	0.510398	0.513431
161	0.08	+	0.0948209	D4	26.0837	opA8	190419	0.20311	0.0548028	0.02655
162	5	+	0.587086	D7	26.0837	opA9	190419	0.554063	0.558754	0.648441
163	5	++	0.590509	D10	26.0837	opA9	190419	0.623216	0.709242	0.439068
164	2	+	0.412853	E1	26.0837	opA9	190419	0.476777	0.380779	0.381003
165	0.4	+	0.124847	E4	26.0837	opA9	190419	0.190176	0.1137	0.0706651
166	0.08	+	-0.00294246	E7	26.0837	opA9	190419	-0.00482819	0.00620044	-0.0101996
167	5	+	0.18953	E10	26.0837	opA9 M60F	190419	0.216705	0.228203	0.123682
168	5	++	0.146479	F1	26.0837	opA9 M60F	190419	0.117038	0.089753	0.232647
169	2	+	0.109925	F4	26.0837	opA9 M60F	190419	0.133834	0.0584813	0.137458
170	0.4	+	0.00218685	F7	26.0837	opA9 M60F	190419	-0.0268319	0.0175202	0.0158723
171	0.08	+	-0.00985418	F10	26.0837	opA9 M60F	190419	0.0390791	-0.0116104	-0.0570312
172	5	+	0.228896	G1	26.0837	ancCG	190419	0.132089	0.344982	0.209616
173	5	++	0.19608	G4	26.0837	ancCG	190419	0.227971	0.206687	0.153583
174	2	+	0.0859922	G7	26.0837	ancCG	190419	0.0696684	0.0505363	0.137772
175	0.4	+	-0.00377456	G10	26.0837	ancCG	190419	0.0398533	-0.00568144	-0.0454956
176	0.08	+	-0.019636	H1	26.0837	ancCG	190419	-0.0169235	-0.00332579	-0.0386587
177			-0.0616291	A1	20.5094	Buffer	190425	0.0069637	-0.0929254	-0.0989257
178			-0.0773368	A4	20.5094	PB	190425	-0.057934	-0.0921144	-0.0819621
179			1	A7	20.5094	LPS	190425	1.02718	0.902087	1.07073
180			7.22801e-20	A10	20.5094	LPS + PB	190425	0.00999674	-0.0108431	0.000846399
181	5	+	0.879284	B1	20.5094	hA9	190425	0.993307	0.926873	0.717671
182	5	++	0.937647	B4	20.5094	hA9	190425	1.15787	0.809801	0.845266
183	2	+	0.528979	B7	20.5094	hA9	190425	0.508228	0.596173	0.482535
184	0.4	+	0.10794	B10	20.5094	hA9	190425	0.201499	0.0922758	0.0300466
185	0.08	+	0.0612008	C1	20.5094	hA9	190425	0.142996	0.0250058	0.0156003
186	5	+	0.0922194	D7	20.5094	opA9 M60F	190425	0.110823	0.0924739	0.0733615
187	5	++	0.0790367	D10	20.5094	opA9 M60F	190425	0.171367	0.0124923	0.0532514
188	2	+	0.0469081	E1	20.5094	opA9 M60F	190425	0.0541882	0.0445574	0.0419788
189	0.4	+	0.012275	E4	20.5094	opA9 M60F	190425	0.0346785	0.0346453	-0.0324989
190	0.08	+	-0.00578326	E7	20.5094	opA9 M60F	190425	0.0353034	-0.049955	-0.00269818
191	5	+	0.291182	E10	20.5094	ancCG	190425	0.432315	0.240862	0.200367
192	5	++	0.290174	F1	20.5094	ancCG	190425	0.238545	0.3718	0.260177
193	2	+	0.138153	F4	20.5094	ancCG	190425	0.237765	0.138318	0.0383752
194	0.4	+	0.0250322	F7	20.5094	ancCG	190425	0.0159948	0.0374953	0.0216064
195	0.08	+	-0.0153447	F10	20.5094	ancCG	190425	0.00213562	9.64093e-05	-0.0482661
196	2	+	1.16046	C4	20.5094	opA8	190425	1.49008	0.928468	1.06283
197	5	+	0.707469	C7	20.5094	opA9	190425	0.7284	0.741136	0.65287
198	2	+	0.406094	C10	20.5094	opA9	190425	0.521606	0.387408	0.309269
199	0.4	+	0.0632122	D1	20.5094	opA9	190425	0.0997896	0.0361728	0.0536742
200	0.08	+	0.0318069	D4	20.5094	opA9	190425	0.0621082	0.0148143	0.0184982
