# Supplementary material for: Evolution of multifunctionality through a pleiotropic substitution in the innate immune protein S100A9
Source: eLife journal article supplement (doi:10.7554/elife.54100), 2020-04-07
Supplement: supp [file elife-54100-supp-v1.zip › elife_poa_e54100_Figure_5_source_data_1.xlsx]

## Sheet: a9-csv-eLife
hA9				hA9 M63F
wavelength	cd	ht	mme	wavelength	cd	ht	mme
250	-0.371692	292.511	-0.651752	250	-0.157033	292.786	-0.275353
249	-0.298709	293.05	-0.523779	249	-0.367465	293.283	-0.64434
248	-0.129991	293.521	-0.227936	248	-0.119479	293.802	-0.209503
247	-0.792015	294.05	-1.38878	247	-0.640016	294.246	-1.12225
246	-1.0242	294.654	-1.79591	246	-0.864984	294.834	-1.51673
245	-0.993782	295.237	-1.74257	245	-1.04484	295.397	-1.8321
244	-1.29975	295.799	-2.27908	244	-1.07446	295.894	-1.88404
243	-1.7818	296.535	-3.12434	243	-1.53916	296.563	-2.69888
242	-2.49563	297.273	-4.37602	242	-2.14854	297.268	-3.76741
241	-3.14141	298.114	-5.50838	241	-2.76129	298.026	-4.84185
240	-3.92312	299.139	-6.87909	240	-3.46349	299.016	-6.07314
239	-4.74682	300.339	-8.32343	239	-4.62349	300.062	-8.10717
238	-5.89204	301.648	-10.3315	238	-5.6536	301.264	-9.91344
237	-7.33731	303.12	-12.8658	237	-6.99052	302.662	-12.2577
236	-8.56823	304.745	-15.0242	236	-8.4389	304.068	-14.7974
235	-10.2171	306.499	-17.9154	235	-10.2589	305.629	-17.9887
234	-11.9455	308.403	-20.9461	234	-11.9991	307.388	-21.0401
233	-13.8753	310.482	-24.33	233	-13.7334	309.281	-24.0812
232	-15.7148	312.718	-27.5555	232	-15.7269	311.252	-27.5767
231	-17.9166	315.154	-31.4163	231	-18.0553	313.468	-31.6595
230	-19.8095	317.567	-34.7354	230	-20.3469	315.737	-35.6778
229	-21.9998	320.223	-38.5761	229	-22.471	318.136	-39.4023
228	-23.9005	323.106	-41.9089	228	-24.6302	320.82	-43.1884
227	-25.3362	325.86	-44.4264	227	-25.8983	323.419	-45.412
226	-26.8593	328.696	-47.0971	226	-27.5595	325.985	-48.3249
225	-28.2543	331.559	-49.5432	225	-28.69	328.613	-50.3072
224	-28.6214	334.396	-50.1869	224	-29.7208	331.262	-52.1147
223	-29.2948	337.34	-51.3677	223	-30.2354	333.913	-53.017
222	-29.161	340.547	-51.1331	222	-30.5273	336.739	-53.5288
221	-29.6881	343.933	-52.0573	221	-30.5179	339.686	-53.5124
220	-29.2968	347.646	-51.3712	220	-29.9837	342.76	-52.5756
219	-29.3843	351.38	-51.5246	219	-29.4052	345.755	-51.5613
218	-29.7205	354.79	-52.1141	218	-28.889	348.605	-50.6561
217	-29.6902	358.22	-52.061	217	-28.5214	351.581	-50.0115
216	-29.9548	362.021	-52.525	216	-28.0236	354.752	-49.1387
215	-29.2013	366.105	-51.2037	215	-27.799	357.91	-48.7448
214	-28.7324	370.259	-50.3815	214	-27.8282	361.295	-48.796
213	-29.9432	374.525	-52.5046	213	-27.7846	364.855	-48.7196
212	-30.7612	379.284	-53.939	212	-28.7695	368.84	-50.4466
211	-32.1978	384.8	-56.458	211	-30.0571	373.369	-52.7044
210	-33.4019	390.747	-58.5694	210	-30.8307	378.192	-54.0608
209	-34.7794	397.327	-60.9848	209	-31.1732	383.657	-54.6614
208	-34.4377	404.815	-60.3856	208	-31.9844	389.83	-56.0838
207	-33.6973	413.18	-59.0874	207	-31.2708	396.752	-54.8325
206	-31.5441	422.628	-55.3118	206	-29.4647	404.483	-51.6656
205	-28.2712	433.462	-49.5728	205	-26.3756	413.246	-46.2489
204	-23.4533	446.079	-41.1248	204	-21.4798	423.445	-37.6643
203	-17.4885	460.991	-30.6656	203	-17.5328	435.58	-30.7433
202	-9.52855	479.161	-16.7081	202	-10.5066	450.663	-18.4231
201	-1.03929	502.006	-1.82237	201	-2.12457	470.147	-3.72538
200	9.06443	531.702	15.8942	200	5.19478	495.848	9.10891
199	19.8309	568.698	34.773	199	17.637	530.375	30.926
198	26.4008	614.713	46.2931	198	28.3445	574.363	49.7014
197	38.0915	668.548	66.7925	197	40.1319	630.319	70.3703
196	16.5545	714.037	29.0279	196	37.0371	689.261	64.9436
195	-19.9441	731.286	-34.9715	195	35.0916	729.59	61.5322
194	9.30318	730.852	16.3129	194	-0.485287	737.407	-0.850938
193	-20.68	726.027	-36.2618	193	-17.4822	732.624	-30.6546
192	-49.0057	721.085	-85.9302	192	-2.63212	727.177	-4.61535
191	8.72911	718.042	15.3063	191	-1.40329	722.325	-2.46063
190	-1.53697	715.884	-2.69504	190	5.89205	720.408	10.3316
