# Supplementary material for: Evolution of multifunctionality through a pleiotropic substitution in the innate immune protein S100A9
Source: eLife journal article supplement (doi:10.7554/elife.54100), 2020-04-07
Supplement: supp [file elife-54100-supp-v1.zip › elife_poa_e54100_Figure_5_source_data_2.xlsx]

## Sheet: a9-unfolding-kinetics-eLife
hA9			hA9 M63F
Time (mins)	CD (mdeg)	HT (V)	Time (mins)	CD (mdeg)	HT (V)
0.0167	-5.28891	324.369	0.0167	-16.7968	320.003
0.0333	-6.11975	340.095	0.0333	-19.2931	337.094
0.05	-5.6923	340.083	0.05	-19.0185	337.086
0.0667	-5.84927	340.082	0.0667	-19.1506	337.107
0.0833	-6.03149	340.066	0.0833	-18.9994	337.122
0.1	-5.93705	340.043	0.1	-18.8834	337.121
0.1167	-5.86917	340.028	0.1167	-18.7306	337.129
0.1333	-5.83075	340.028	0.1333	-18.6326	337.161
0.15	-5.73928	340.041	0.15	-18.2554	337.19
0.1667	-6.0968	340.017	0.1667	-17.8361	337.21
0.1833	-6.30231	339.996	0.1833	-17.6782	337.219
0.2	-6.17814	339.979	0.2	-17.7142	337.202
0.2167	-6.04898	339.945	0.2167	-17.6372	337.212
0.2333	-6.04165	339.957	0.2333	-17.1485	337.216
0.25	-5.91164	339.988	0.25	-17.3667	337.236
0.2667	-5.95008	339.955	0.2667	-17.4808	337.268
0.2833	-5.96671	339.929	0.2833	-16.9634	337.258
0.3	-5.89226	339.959	0.3	-16.687	337.261
0.3167	-6.01761	339.981	0.3167	-16.6379	337.282
0.3333	-5.93241	339.96	0.3333	-16.4011	337.294
0.35	-6.12802	339.952	0.35	-16.454	337.301
0.3667	-6.40079	339.963	0.3667	-16.6487	337.33
0.3833	-6.06035	339.973	0.3833	-16.227	337.344
0.4	-5.80085	339.976	0.4	-15.651	337.343
0.4167	-5.86307	339.976	0.4167	-15.7253	337.339
0.4333	-5.72645	339.98	0.4333	-16.0172	337.332
0.45	-5.73203	339.973	0.45	-15.8069	337.333
0.4667	-6.2959	339.965	0.4667	-15.3616	337.324
0.4833	-6.27192	339.958	0.4833	-15.2405	337.333
0.5	-5.88672	339.951	0.5	-15.4646	337.346
0.5167	-5.79216	339.959	0.5167	-15.3905	337.344
0.5333	-5.74165	339.96	0.5333	-15.1362	337.345
0.55	-5.77111	339.957	0.55	-15.0317	337.341
0.5667	-6.11217	339.961	0.5667	-14.8708	337.332
0.5833	-6.40907	339.96	0.5833	-14.4022	337.335
0.6	-6.04886	339.975	0.6	-14.3117	337.361
0.6167	-5.98527	339.981	0.6167	-14.5526	337.365
0.6333	-6.0128	339.99	0.6333	-14.6969	337.371
0.65	-6.10998	339.986	0.65	-14.8145	337.382
0.6667	-5.98796	339.987	0.6667	-14.4764	337.385
0.6833	-5.73222	339.979	0.6833	-14.2139	337.341
0.7	-5.78208	339.968	0.7	-14.4637	337.301
0.7167	-5.76395	339.983	0.7167	-14.196	337.332
0.7333	-5.7978	339.973	0.7333	-13.9723	337.369
0.75	-5.73941	339.955	0.75	-14.1116	337.392
0.7667	-5.93921	339.941	0.7667	-13.9568	337.394
0.7833	-6.23592	339.946	0.7833	-13.7352	337.4
0.8	-6.08654	339.951	0.8	-13.7771	337.397
0.8167	-5.73782	339.936	0.8167	-13.6748	337.396
0.8333	-5.86479	339.929	0.8333	-13.2919	337.39
0.85	-6.1396	339.948	0.85	-13.1306	337.368
0.8667	-5.98423	339.963	0.8667	-13.4435	337.382
0.8833	-6.01059	339.952	0.8833	-13.6051	337.376
0.9	-6.2996	339.937	0.9	-13.201	337.371
0.9167	-6.35911	339.924	0.9167	-12.6444	337.415
0.9333	-5.82828	339.923	0.9333	-12.7459	337.414
0.95	-5.6604	339.926	0.95	-13.1969	337.396
0.9667	-6.1282	339.906	0.9667	-12.9326	337.419
0.9833	-6.08954	339.921	0.9833	-12.8901	337.42
1	-5.90128	339.928	1	-12.9733	337.416
1.0167	-6.0661	339.891	1.0167	-12.7022	337.408
1.0333	-6.46312	339.887	1.0333	-12.6291	337.401
1.05	-6.36515	339.896	1.05	-12.3838	337.419
1.0667	-6.1237	339.892	1.0667	-12.4259	337.412
1.0833	-6.04066	339.885	1.0833	-12.5454	337.415
1.1	-5.92635	339.878	1.1	-12.2524	337.435
1.1167	-5.97864	339.854	1.1167	-11.9236	337.432
1.1333	-5.98763	339.858	1.1333	-11.9125	337.417
1.15	-6.02698	339.879	1.15	-11.9576	337.412
1.1667	-6.00487	339.89	1.1667	-12.1559	337.411
1.1833	-5.96269	339.903	1.1833	-12.3059	337.404
1.2	-5.7808	339.89	1.2	-11.9936	337.408
1.2167	-5.91714	339.868	1.2167	-12.1165	337.443
1.2333	-6.01261	339.88	1.2333	-12.2092	337.44
1.25	-5.74016	339.884	1.25	-11.6936	337.438
1.2667	-5.75942	339.871	1.2667	-11.581	337.476
1.2833	-6.06836	339.864	1.2833	-11.5932	337.494
1.3	-6.35424	339.859	1.3	-11.4428	337.466
1.3167	-6.10885	339.866	1.3167	-11.2564	337.438
1.3333	-6.08251	339.876	1.3333	-10.9745	337.442
1.35	-6.2224	339.881	1.35	-11.2925	337.446
1.3667	-6.16323	339.877	1.3667	-11.4819	337.461
1.3833	-6.12109	339.865	1.3833	-11.0673	337.485
1.4	-5.92825	339.841	1.4	-11.0061	337.491
1.4167	-5.72141	339.851	1.4167	-10.9633	337.487
1.4333	-6.15702	339.856	1.4333	-11.1903	337.478
1.45	-6.35261	339.847	1.45	-11.2125	337.46
1.4667	-6.04688	339.842	1.4667	-10.7399	337.469
1.4833	-6.00661	339.824	1.4833	-10.5629	337.499
1.5	-5.93106	339.843	1.5	-10.7671	337.485
1.5167	-5.97998	339.874	1.5167	-10.943	337.455
1.5333	-6.04957	339.867	1.5333	-10.8893	337.465
1.55	-6.30874	339.857	1.55	-10.8222	337.475
1.5667	-6.23285	339.863	1.5667	-10.629	337.482
1.5833	-6.17883	339.851	1.5833	-10.9288	337.493
1.6	-6.12199	339.842	1.6	-11.0955	337.472
1.6167	-5.82892	339.856	1.6167	-10.8661	337.457
1.6333	-5.65652	339.881	1.6333	-10.636	337.473
1.65	-5.58504	339.888	1.65	-10.7315	337.459
1.6667	-5.68924	339.861	1.6667	-10.4639	337.48
1.6833	-5.85985	339.858	1.6833	-10.1811	337.487
1.7	-5.91703	339.852	1.7	-10.3676	337.474
1.7167	-5.64754	339.851	1.7167	-10.4527	337.466
1.7333	-6.1008	339.861	1.7333	-10.3478	337.464
1.75	-6.59343	339.879	1.75	-10.1904	337.482
1.7667	-6.3304	339.862	1.7667	-10.2106	337.492
1.7833	-6.36007	339.823	1.7833	-10.3675	337.492
1.8	-6.46995	339.84	1.8	-10.3402	337.479
1.8167	-5.95172	339.834	1.8167	-10.3964	337.479
1.8333	-5.76705	339.808	1.8333	-10.2577	337.495
1.85	-6.16941	339.819	1.85	-9.92516	337.498
1.8667	-5.88156	339.85	1.8667	-10.2505	337.49
1.8833	-5.70578	339.826	1.8833	-10.4909	337.48
1.9	-5.71449	339.792	1.9	-10.2373	337.485
1.9167	-5.35715	339.824	1.9167	-9.64017	337.482
1.9333	-5.49701	339.806	1.9333	-9.27078	337.434
1.95	-5.93848	339.79	1.95	-9.69245	337.44
1.9667	-6.02905	339.821	1.9667	-9.83602	337.501
1.9833	-5.97218	339.822	1.9833	-9.7318	337.508
2	-6.11067	339.784	2	-9.79274	337.491
2.0167	-6.04876	339.766	2.0167	-9.7214	337.493
2.0333	-5.70482	339.783	2.0333	-9.55533	337.488
2.05	-5.9506	339.799	2.05	-9.36902	337.465
2.0667	-6.04699	339.805	2.0667	-9.51736	337.464
2.0833	-5.97554	339.769	2.0833	-9.79086	337.452
2.1	-6.35061	339.756	2.1	-9.85701	337.468
2.1167	-6.02936	339.786	2.1167	-9.53547	337.506
2.1333	-5.55673	339.803	2.1333	-9.44994	337.525
2.15	-5.90052	339.806	2.15	-9.5585	337.521
2.1667	-6.10686	339.789	2.1667	-9.54477	337.504
2.1833	-6.04796	339.778	2.1833	-9.40348	337.515
2.2	-6.03246	339.795	2.2	-8.87225	337.521
2.2167	-6.00138	339.78	2.2167	-8.70375	337.522
2.2333	-6.14234	339.781	2.2333	-8.83709	337.512
2.25	-6.02045	339.799	2.25	-8.87907	337.502
2.2667	-5.99008	339.776	2.2667	-9.10195	337.51
2.2833	-6.46666	339.764	2.2833	-9.1853	337.515
2.3	-6.1472	339.781	2.3	-8.97952	337.505
2.3167	-5.72508	339.775	2.3167	-9.07093	337.518
2.3333	-6.08042	339.736	2.3333	-9.06904	337.522
2.35	-6.29419	339.75	2.35	-8.52935	337.506
2.3667	-6.09375	339.78	2.3667	-8.5074	337.517
2.3833	-5.7356	339.765	2.3833	-8.80384	337.521
2.4	-5.79452	339.739	2.4	-9.09626	337.504
2.4167	-6.08948	339.733	2.4167	-8.859	337.507
2.4333	-6.06489	339.754	2.4333	-8.29866	337.529
2.45	-6.06845	339.751	2.45	-8.23465	337.549
2.4667	-6.19391	339.737	2.4667	-8.26861	337.568
2.4833	-6.00885	339.749	2.4833	-8.76202	337.557
2.5	-6.31275	339.756	2.5	-8.79386	337.537
2.5167	-6.55501	339.768	2.5167	-8.56042	337.551
2.5333	-6.19114	339.74	2.5333	-8.61929	337.544
2.55	-6.18262	339.721	2.55	-8.54855	337.527
2.5667	-6.22794	339.741	2.5667	-8.50381	337.539
2.5833	-6.16158	339.74	2.5833	-8.37414	337.545
2.6	-5.83382	339.765	2.6	-8.58292	337.534
2.6167	-5.56894	339.768	2.6167	-8.80273	337.525
2.6333	-5.8301	339.761	2.6333	-8.52227	337.547
2.65	-5.97042	339.782	2.65	-8.41139	337.55
2.6667	-6.0832	339.778	2.6667	-8.33494	337.513
2.6833	-6.2349	339.748	2.6833	-8.09854	337.481
2.7	-6.01617	339.718	2.7	-8.21339	337.484
2.7167	-5.89733	339.723	2.7167	-8.18045	337.504
2.7333	-5.85882	339.75	2.7333	-7.99485	337.526
2.75	-5.86784	339.731	2.75	-7.96051	337.532
2.7667	-6.01919	339.706	2.7667	-7.87464	337.543
2.7833	-5.95984	339.705	2.7833	-7.9203	337.552
2.8	-5.74368	339.719	2.8	-8.0856	337.543
2.8167	-5.72643	339.729	2.8167	-8.30351	337.538
2.8333	-6.14969	339.718	2.8333	-8.30132	337.526
2.85	-5.99194	339.733	2.85	-8.16742	337.526
2.8667	-5.79004	339.742	2.8667	-7.91203	337.542
2.8833	-5.73615	339.728	2.8833	-7.84479	337.563
2.9	-5.9397	339.73	2.9	-8.02687	337.561
2.9167	-5.91868	339.735	2.9167	-7.84526	337.544
2.9333	-5.8062	339.729	2.9333	-7.72673	337.548
2.95	-6.02912	339.719	2.95	-7.89096	337.567
2.9667	-5.94467	339.742	2.9667	-7.638	337.587
2.9833	-5.8111	339.729	2.9833	-7.45551	337.561
3	-5.58589	339.72	3	-7.73977	337.519
3.0167	-5.55995	339.747	3.0167	-7.68085	337.553
3.0333	-5.6281	339.739	3.0333	-7.7733	337.538
3.05	-5.91566	339.717	3.05	-7.87768	337.496
3.0667	-5.88126	339.711	3.0667	-7.65631	337.514
3.0833	-6.04647	339.686	3.0833	-7.5624	337.535
3.1	-5.96333	339.679	3.1	-7.39455	337.552
3.1167	-5.45446	339.703	3.1167	-7.65698	337.541
3.1333	-5.82358	339.707	3.1333	-7.76776	337.53
3.15	-6.0889	339.699	3.15	-7.22259	337.553
3.1667	-6.23192	339.682	3.1667	-7.16464	337.552
3.1833	-6.06965	339.674	3.1833	-7.50954	337.538
3.2	-5.69921	339.691	3.2	-7.65861	337.526
3.2167	-6.26974	339.688	3.2167	-7.69253	337.528
3.2333	-6.02072	339.687	3.2333	-7.69315	337.533
3.25	-5.49773	339.718	3.25	-7.37678	337.524
3.2667	-6.03094	339.718	3.2667	-7.3223	337.531
3.2833	-6.22063	339.71	3.2833	-7.48892	337.495
3.3	-5.9841	339.701	3.3	-7.35184	337.49
3.3167	-5.92872	339.667	3.3167	-7.33273	337.509
3.3333	-5.75743	339.669	3.3333	-7.67129	337.487
3.35	-5.68027	339.69	3.35	-7.45568	337.492
3.3667	-5.74866	339.694	3.3667	-6.85542	337.509
3.3833	-6.0836	339.706	3.3833	-6.92026	337.529
3.4	-6.33041	339.72	3.4	-7.18692	337.531
3.4167	-5.86636	339.746	3.4167	-7.41638	337.539
3.4333	-5.49409	339.747	3.4333	-7.62236	337.542
3.45	-5.73015	339.712	3.45	-7.14902	337.549
3.4667	-6.12481	339.692	3.4667	-6.97134	337.567
3.4833	-6.24464	339.725	3.4833	-7.02864	337.568
3.5	-6.10009	339.74	3.5	-6.66995	337.565
3.5167	-5.91021	339.722	3.5167	-6.87817	337.565
3.5333	-5.86335	339.717	3.5333	-6.97556	337.562
3.55	-5.99481	339.737	3.55	-7.00592	337.535
3.5667	-5.8519	339.733	3.5667	-7.19068	337.554
3.5833	-5.83771	339.705	3.5833	-7.28012	337.578
3.6	-6.28344	339.703	3.6	-7.09348	337.551
3.6167	-5.90509	339.716	3.6167	-6.9436	337.536
3.6333	-5.58476	339.704	3.6333	-7.02103	337.522
3.65	-5.54498	339.696	3.65	-6.8248	337.511
3.6667	-5.57313	339.693	3.6667	-6.68874	337.544
3.6833	-5.74913	339.687	3.6833	-6.80549	337.546
3.7	-5.74408	339.693	3.7	-6.75327	337.536
3.7167	-5.92939	339.698	3.7167	-6.67896	337.532
3.7333	-5.98607	339.705	3.7333	-6.7731	337.524
3.75	-5.74069	339.7	3.75	-6.7499	337.55
3.7667	-5.68085	339.699	3.7667	-6.69179	337.531
3.7833	-5.7271	339.7	3.7833	-6.54859	337.532
3.8	-5.9554	339.674	3.8	-6.67268	337.537
3.8167	-6.14411	339.666	3.8167	-6.6492	337.52
3.8333	-5.85962	339.688	3.8333	-6.57083	337.527
3.85	-5.76691	339.664	3.85	-7.00284	337.535
3.8667	-5.81672	339.662	3.8667	-7.0342	337.55
3.8833	-5.76118	339.666	3.8833	-6.50853	337.534
3.9	-5.9278	339.651	3.9	-6.58796	337.525
3.9167	-5.97532	339.679	3.9167	-6.8223	337.513
3.9333	-5.80034	339.698	3.9333	-6.54965	337.504
3.95	-5.79931	339.702	3.95	-6.57072	337.537
3.9667	-5.75432	339.707	3.9667	-6.69807	337.546
3.9833	-5.83156	339.691	3.9833	-6.53352	337.534
4	-6.08507	339.68	4	-6.34856	337.538
4.0167	-5.97195	339.684	4.0167	-6.11142	337.571
4.0333	-5.98159	339.69	4.0333	-5.985	337.594
4.05	-6.0026	339.701	4.05	-6.53934	337.605
4.0667	-5.84212	339.687	4.0667	-6.59982	337.598
4.0833	-6.16051	339.684	4.0833	-6.54822	337.58
4.1	-6.41499	339.694	4.1	-6.80808	337.581
4.1167	-6.2558	339.685	4.1167	-6.50885	337.591
4.1333	-5.91241	339.682	4.1333	-6.61337	337.596
4.15	-6.05603	339.685	4.15	-6.42512	337.592
4.1667	-6.23003	339.698	4.1667	-6.10809	337.58
4.1833	-5.96408	339.698	4.1833	-6.11428	337.575
4.2	-5.95514	339.701	4.2	-6.15233	337.59
4.2167	-5.7894	339.699	4.2167	-6.32997	337.598
			4.2333	-6.40885	337.596
			4.25	-6.35935	337.595
			4.2667	-6.13921	337.594
			4.2833	-6.0551	337.564
			4.3	-5.90927	337.532
			4.3167	-5.76279	337.538
			4.3333	-5.98263	337.557
			4.35	-6.27284	337.558
			4.3667	-6.40895	337.573
			4.3833	-6.12387	337.579
			4.4	-6.19995	337.583
			4.4167	-6.25913	337.558
			4.4333	-6.05226	337.535
			4.45	-6.38797	337.533
			4.4667	-6.14856	337.543
			4.4833	-5.88346	337.56
			4.5	-6.14755	337.55
			4.5167	-6.49718	337.53
			4.5333	-6.68214	337.546
			4.55	-6.43033	337.573
			4.5667	-6.11509	337.577
			4.5833	-6.07779	337.582
			4.6	-5.98633	337.563
			4.6167	-5.93246	337.568
			4.6333	-6.01541	337.583
			4.65	-5.65632	337.587
			4.6667	-5.58667	337.575
			4.6833	-6.05839	337.562
			4.7	-6.15998	337.565
			4.7167	-6.04076	337.547
			4.7333	-6.14318	337.55
			4.75	-6.02524	337.554
			4.7667	-5.8922	337.56
			4.7833	-5.85434	337.573
			4.8	-5.95464	337.549
			4.8167	-6.23562	337.547
			4.8333	-6.00696	337.553
			4.85	-5.81609	337.55
			4.8667	-6.15656	337.557
			4.8833	-5.87351	337.572
			4.9	-5.58561	337.574
			4.9167	-5.70002	337.559
			4.9333	-5.61191	337.556
			4.95	-5.78416	337.558
			4.9667	-5.95968	337.561
			4.9833	-5.92019	337.553
			5	-5.89739	337.543
