# Supplementary material for: Evolution of multifunctionality through a pleiotropic substitution in the innate immune protein S100A9
Source: eLife journal article supplement (doi:10.7554/elife.54100), 2020-04-07
Supplement: supp [file elife-54100-supp-v1.zip › elife_poa_e54100_Figure_5_source_data_3.xlsx]

## Sheet: a9-ca-melt-eLife
hA9					hA9 M63F
mme	osm	weight	ffx	model	mme	osm	weight	ffx	model
-1.57159e+06	0.2	0.0285714	1	0.95224	-1.20675e+06	0.2	0.030303	1	0.994935
-1.45714e+06	0.236	0.0625	0.920694	0.954323	-1.20392e+06	0.4	0.030303	0.997542	0.990606
-1.56769e+06	0.4	0.0285714	0.997296	0.962799	-1.19909e+06	0.6	0.030303	0.993354	0.986273
-1.47345e+06	0.472	0.0625	0.931995	0.965947	-1.19287e+06	0.8	0.030303	0.987952	0.981932
-1.56314e+06	0.6	0.0285714	0.994143	0.970577	-1.16395e+06	0.933	0.0909091	0.962862	0.97904
-1.48339e+06	0.708	0.0625	0.938885	0.973426	-1.16395e+06	0.933	0.0909091	0.962862	0.97904
-1.55811e+06	0.8	0.0285714	0.990659	0.975014	-1.18704e+06	1	0.030303	0.982893	0.977581
-1.49983e+06	0.944	0.0625	0.950276	0.975795	-1.1815e+06	1.2	0.030303	0.978092	0.973212
-1.47815e+06	0.97196	0.0909091	0.935255	0.975688	-1.17865e+06	1.4	0.030303	0.975611	0.968817
-1.55193e+06	1	0.0285714	0.986379	0.975492	-1.17229e+06	1.6	0.030303	0.970092	0.964379
-1.54063e+06	1.2	0.0285714	0.978545	0.971345	-1.16688e+06	1.8	0.030303	0.965399	0.959876
-1.528e+06	1.4	0.0285714	0.969795	0.961901	-1.13722e+06	1.866	0.0909091	0.939666	0.958369
-1.50849e+06	1.6	0.0285714	0.956279	0.94652	-1.13722e+06	1.866	0.0909091	0.939666	0.958369
-1.48244e+06	1.8	0.0285714	0.938228	0.924668	-1.16367e+06	2	0.030303	0.962616	0.955269
-1.38082e+06	1.888	0.0625	0.867812	0.912903	-1.15884e+06	2.2	0.030303	0.958426	0.950502
-1446840	1.94392	0.0909091	0.913558	0.904731	-1.15505e+06	2.4	0.030303	0.955134	0.945484
-1.44649e+06	2	0.0285714	0.913318	0.89599	-1.14544e+06	2.6	0.030303	0.946796	0.940074
-1.40085e+06	2.2	0.0285714	0.881691	0.860394	-1106976	2.799	0.0909091	0.913416	0.93409
-1.33822e+06	2.4	0.0285714	0.838293	0.818127	-1.10698e+06	2.799	0.0909091	0.913416	0.93409
-1.26176e+06	2.6	0.0285714	0.78531	0.76982	-1.13679e+06	2.8	0.030303	0.939289	0.934058
-1.16973e+06	2.8	0.0285714	0.721543	0.71649	-1.13046e+06	3	0.030303	0.933797	0.927102
-1.01543e+06	2.832	0.0625	0.614627	0.707577	-1.11974e+06	3.2	0.030303	0.924489	0.918701
-1.23457e+06	2.91588	0.0909091	0.76647	0.683812	-1.11461e+06	3.4	0.030303	0.920041	0.908096
-1.07363e+06	3	0.0285714	0.65495	0.659485	-1.1041e+06	3.6	0.030303	0.910918	0.894181
-975468	3.2	0.0285714	0.586934	0.600381	-1025683	3.732	0.0909091	0.84287	0.882448
-896783	3.4	0.0285714	0.532412	0.540835	-1.02568e+06	3.732	0.0909091	0.84287	0.882448
-817530	3.6	0.0285714	0.477496	0.482438	-1.08287e+06	3.8	0.030303	0.892499	0.875399
-588101	3.776	0.0625	0.31852	0.433106	-1.05587e+06	4	0.030303	0.869071	0.849695
-746774	3.8	0.0285714	0.428468	0.426576	-1.01481e+06	4.2	0.030303	0.83343	0.81463
-814654	3.88784	0.0909091	0.475503	0.403135	-956486	4.4	0.030303	0.782821	0.767827
-680118	4	0.0285714	0.38228	0.37434	-874484	4.6	0.030303	0.711659	0.707891
-615011	4.2	0.0285714	0.337166	0.326485	-860883	4.665	0.0909091	0.699856	0.685637
-554087	4.4	0.0285714	0.294951	0.283433	-860883	4.665	0.0909091	0.699856	0.685637
-498951	4.6	0.0285714	0.256746	0.245311	-769860	4.8	0.030303	0.620866	0.635643
-390300	4.72	0.0625	0.181459	0.224769	-656753	5	0.030303	0.522711	0.554977
-452093	4.8	0.0285714	0.224277	0.212016	-569898	5.2	0.030303	0.447338	0.472354
-475802	4.8598	0.0909091	0.240705	0.202962	-501702	5.4	0.030303	0.388158	0.394757
-407452	5	0.0285714	0.193345	0.183278	-427096	5.598	0.0909091	0.323415	0.327938
-369405	5.2	0.0285714	0.166981	0.158718	-427096	5.598	0.0909091	0.323415	0.327938
-339707	5.4	0.0285714	0.146403	0.137904	-451930	5.6	0.030303	0.344965	0.327324
-308746	5.6	0.0285714	0.124949	0.12039	-403903	5.8	0.030303	0.303287	0.272192
-216693	5.664	0.0625	0.0611633	0.11541	-357692	6	0.030303	0.263186	0.228901
-283622	5.8	0.0285714	0.10754	0.105738	-305162	6.2	0.030303	0.2176	0.195541
-290003	5.83176	0.0909091	0.111962	0.103647	-247690	6.4	0.030303	0.167725	0.1698
-267962	6	0.0285714	0.0966887	0.0935395	-199707	6.531	0.0909091	0.126085	0.15604
-252658	6.2	0.0285714	0.0860845	0.0834256	-199707	6.531	0.0909091	0.126085	0.15604
-241309	6.4	0.0285714	0.0782201	0.0750681	-141969	7.464	0.0909091	0.0759805	0.0930968
-225321	6.6	0.0285714	0.0671418	0.0681815	-141970	7.464	0.0909091	0.0759805	0.0930968
-255397	6.608	0.0625	0.0879823	0.067933	-140647	8.397	0.0909091	0.0748333	0.0492276
-210418	6.80372	0.0909091	0.0568153	0.0624253	-140648	8.397	0.0909091	0.0748333	0.0492276
-201331	7	0.0285714	0.0505191	0.0578762	-54414.5	9.33	0.0909091	0	0.00797075
-211417	7.552	0.0625	0.0575079	0.0489868	-54414.5	9.33	0.0909091	2.86249e-12	0.00797075
-158132	7.77568	0.0909091	0.0205853	0.0465828
-188804	8.496	0.0625	0.0418385	0.0417235
-150045	8.732	0.0625	0.0149816	0.0407773
-128424	8.74764	0.0909091	0	0.0407226
-276795	9.204	0.0625	0.10281	0.0394693
-218185	9.44	0.0625	0.0621975	0.0390276
-159705	9.7196	0.0909091	0.021675	0.0386343
