# Supplementary material for: Evolution of multifunctionality through a pleiotropic substitution in the innate immune protein S100A9
Source: eLife journal article supplement (doi:10.7554/elife.54100), 2020-04-07
Supplement: supp [file elife-54100-supp-v1.zip › elife_poa_e54100_Figure_6_source_data_2.xlsx]

## Sheet: human_tlr4
Concentration (uM)	Polymixin B	average	label	raw_lps	sample	tag	well1	well2	well3
		1	A1	12.407	LPS	190927	1.32461	0.75315	0.922237
		-1.28659e-17	A4	12.407	LPS + PB	190927	-0.00377124	0.00266592	0.00110532
2	+	0.0148206	B1	12.407	opA9	190927	-0.00820392	0.0317492	0.0209166
2	++	0.013547	B4	12.407	opA9	190927	0.021862	0.0092988	0.00948029
2	+	0.00190718	B7	12.407	altancA9	190927	0.0108175	0.00639248	-0.0114884
2	++	0.0221816	B10	12.407	altancA9	190927	0.0230658	0.0136012	0.0298777
2	+	0.00301282	C1	12.407	altancCG	190927	-0.00517512	0.00568728	0.00852631
2	++	-0.0061313	C4	12.407	altancCG	190927	-0.0115535	0.00204894	-0.00888934
2	+	0.596701	C7	12.407	hA9 M63A	190927	0.482807	0.644796	0.662499
2	++	0.597671	C10	12.407	hA9 M63A	190927	0.591104	0.597204	0.604706
		1	A1	9.3801	LPS	190926	1.10772	0.731905	1.16038
		4.62593e-18	A4	9.3801	LPS + PB	190926	-0.0071302	-0.00890574	0.0160359
2	+	0.887402	B1	9.3801	hA9 M63A	190926	0.930097	0.890654	0.841454
2	++	0.864274	B4	9.3801	hA9 M63A	190926	1.01066	0.607028	0.975131
2	+	0.0199856	B7	9.3801	opA9	190926	0.0176386	0.0347198	0.00759835
2	++	0.0502381	B10	9.3801	opA9	190926	0.0369795	0.0155359	0.0981988
2	+	0.0211262	C1	9.3801	altancA9	190926	0.0380536	0.00317544	0.0221495
2	++	0.0188144	C4	9.3801	altancA9	190926	0.067619	-0.000411718	-0.0107641
2	+	0.0157322	C7	9.3801	altancCG	190926	0.0239947	0.00656087	0.0166411
2	++	0.00413259	C10	9.3801	altancCG	190926	0.0416057	-0.00180329	-0.0274046
		1	A1	9.34354	LPS	190923	1.39808	0.688047	0.913876
		0	A4	9.34354	LPS + PB	190923	0.000980962	-0.00648327	0.00550231
4	-	1.37866	B1	9.34354	hA9 M63A	190923	1.35595	1.33108	1.44893
4	+	0.838138	B4	9.34354	hA9 M63A	190923	1.07375	0.933807	0.50686
4	++	0.738791	B7	9.34354	hA9 M63A	190923	1.03467	0.790566	0.391138
2	+	0.821934	B10	9.34354	hA9 M63A	190923	0.855714	0.839687	0.7704
0.4	+	0.478209	C1	9.34354	hA9 M63A	190923	0.56776	0.563586	0.30328
0.08	+	0.112658	C4	9.34354	hA9 M63A	190923	0.101411	0.105176	0.131387
4	-	0.479637	C7	9.34354	opA9	190923	0.579101	0.336441	0.523368
4	+	0.0463718	C10	9.34354	opA9	190923	0.0868456	0.0140388	0.038231
4	++	0.0387675	D1	9.34354	opA9	190923	0.0973696	-0.00461213	0.023545
2	+	0.00887963	D4	9.34354	opA9	190923	0.0155038	0.00227476	0.00886033
0.4	+	-0.00503407	D7	9.34354	opA9	190923	-0.0182296	-0.00540457	0.00853199
0.08	+	-0.0163944	D10	9.34354	opA9	190923	-0.0368879	-0.00322856	-0.00906677
		1	A1	9.34354	LPS	190923	1.39808	0.688047	0.913876
		0	A4	9.34354	LPS + PB	190923	0.000980962	-0.00648327	0.00550231
2	+	-0.00344388	E1	9.34354	hCP	190923	-0.00198868	0.00563129	-0.0139743
2	++	0.00267686	E4	9.34354	hCP	190923	0.0200757	-0.0166678	0.00462272
2	+	-0.0157642	E7	9.34354	altancA9	190923	-0.0261948	-0.0144272	-0.00667054
2	++	0.00993965	E10	9.34354	altancA9	190923	0.0114081	0.00262316	0.0157877
2	+	0.012966	F1	9.34354	altancCG	190923	0.00431865	0.0297486	0.0048307
2	++	-0.021643	F4	9.34354	altancCG	190923	-0.00735957	-0.0321943	-0.0253752
		1	A1	22.0007	LPS	190916	1.51648	0.933697	0.549819
		-1.59016e-18	A4	22.0007	LPS + PB	190916	0.0086931	-0.0113569	0.00266376
4	-	1.56269	A7	22.0007	hA9	190916	1.50514	1.68111	1.50182
4	+	1.47872	A10	22.0007	hA9	190916	1.64934	1.3582	1.42863
4	++	1.60849	B1	22.0007	hA9	190916	1.81964	1.82757	1.17826
2	+	1.38171	B4	22.0007	hA9	190916	1.72409	1.3444	1.07663
0.4	+	0.685864	B7	22.0007	hA9	190916	0.825832	0.622068	0.609691
0.08	+	0.299742	B10	22.0007	hA9	190916	0.290226	0.218255	0.390744
		1	A1	22.0007	LPS	190916	1.51648	0.933697	0.549819
		-1.59016e-18	A4	22.0007	LPS + PB	190916	0.0086931	-0.0113569	0.00266376
2	+	0.601754	D7	22.0007	hA9 M63A	190916	0.603126	0.586259	0.615876
2	++	0.596657	D10	22.0007	hA9 M63A	190916	0.683172	0.638282	0.468518
		1	A1	12.2001	LPS	190915	1.28207	0.906028	0.811898
		2.89121e-18	A4	12.2001	LPS + PB	190915	-0.00550595	0.0135775	-0.00807153
4	-	1.8228	A7	12.2001	hA9	190915	2.36753	1.59878	1.50208
4	+	1.20762	A10	12.2001	hA9	190915	1.20982	1.20917	1.20388
4	++	1.3194	B1	12.2001	hA9	190915	1.24339	1.15455	1.56026
2	+	1.31289	B4	12.2001	hA9	190915	1.26169	1.20234	1.47465
0.4	+	0.661443	B7	12.2001	hA9	190915	0.562679	0.832628	0.589023
0.08	+	0.200039	B10	12.2001	hA9	190915	0.223553	0.213319	0.163244
		1	A1	12.2001	LPS	190915	1.28207	0.906028	0.811898
		2.89121e-18	A4	12.2001	LPS + PB	190915	-0.00550595	0.0135775	-0.00807153
2	+	0.606141	D7	12.2001	hA9 M63A	190915	0.677813	0.608775	0.531835
2	++	0.674691	D10	12.2001	hA9 M63A	190915	0.833865	0.721269	0.468937
2	+	0.00336401	E4	12.2001	ancA9 M59F	190915	0.00711955	0.0120367	-0.00906421
2	++	0.00086529	E7	12.2001	ancA9 M59F	190915	0.00547435	-0.0105834	0.00770492
2	+	0.0112669	E10	12.2001	ancCG	190915	0.00743215	0.0137753	0.0125931
2	++	-0.012371	F1	12.2001	ancCG	190915	-0.0275916	-0.0154698	0.00594826
		1	A1	12.2001	LPS	190915	1.28207	0.906028	0.811898
		2.89121e-18	A4	12.2001	LPS + PB	190915	-0.00550595	0.0135775	-0.00807153
2	+	0.0189994	E1	12.2001	ancA9	190915	0.015288	0.0189418	0.0227684
		1	A1	15.6039	LPS	190914	0.963354	1.21658	0.82007
		-2.89121e-19	A4	15.6039	LPS + PB	190914	-0.0223404	0.0196286	0.00271176
2	-	0.668598	D10	15.6039	ancA9	190914	0.896667	0.645648	0.46348
2	+	0.0352202	E1	15.6039	ancA9	190914	0.0417867	0.0327707	0.0311033
2	-	0.0359125	E4	15.6039	ancCG	190914	0.0105667	0.0516409	0.0455299
2	+	-0.0122421	E7	15.6039	ancCG	190914	-0.0126329	-0.0065655	-0.017528
		1	A1	15.6039	LPS	190914	0.963354	1.21658	0.82007
		-2.89121e-19	A4	15.6039	LPS + PB	190914	-0.0223404	0.0196286	0.00271176
4	-	1.07286	B1	15.6039	hA9 M63A	190914	1.17985	1.21237	0.826359
4	+	0.713554	B4	15.6039	hA9 M63A	190914	0.791084	0.663929	0.685647
4	++	0.729497	B7	15.6039	hA9 M63A	190914	0.730069	0.731977	0.726444
2	+	0.622507	B10	15.6039	hA9 M63A	190914	0.616467	0.601643	0.64941
0.4	+	0.425239	C1	15.6039	hA9 M63A	190914	0.434426	0.397073	0.444218
0.08	+	0.0804156	C4	15.6039	hA9 M63A	190914	0.0946233	0.0781823	0.0684412
		1	A1	15.6039	LPS	190914	0.963354	1.21658	0.82007
		-2.89121e-19	A4	15.6039	LPS + PB	190914	-0.0223404	0.0196286	0.00271176
2	-	1.07117	A7	15.6039	hA9	190914	0.869336	1.22715	1.11701
2	+	1.13701	A10	15.6039	hA9	190914	1.2817	0.989535	1.1398
		0.0102388	A1	14.0723	Buffer	190121	0.0683243	-0.0247091	-0.0128989
		-0.0111233	A4	14.0723	PB	190121	-0.00894255	-0.0127641	-0.0116631
		1	A7	14.0723	LPS	190121	1.09781	1.01942	0.882769
		-2.31296e-18	A10	14.0723	LPS + PB	190121	0.0479938	-0.0299916	-0.0180023
5	-	3.03593	B1	14.0723	hA9	190121	2.91942	2.86508	3.3233
5	+	2.18442	B4	14.0723	hA9	190121	2.29319	1.88845	2.37162
5	++	2.26072	B7	14.0723	hA9	190121	2.60151	2.29556	1.8851
2	+	1.77699	B10	14.0723	hA9	190121	1.89694	1.50865	1.92539
0.4	+	0.76397	C1	14.0723	hA9	190121	0.927203	0.834102	0.530605
0.08	+	0.0970255	C4	14.0723	hA9	190121	0.131362	0.0942496	0.0654646
5	-	1.43009	C7	14.0723	hA9 M63F	190121	1.57538	1.39691	1.31798
5	+	0.244476	C10	14.0723	hA9 M63F	190121	0.243943	0.278424	0.211062
5	++	0.300429	D1	14.0723	hA9 M63F	190121	0.276462	0.318346	0.306478
2	+	0.168094	D4	14.0723	hA9 M63F	190121	0.195582	0.129718	0.178983
0.4	+	0.0394587	D7	14.0723	hA9 M63F	190121	0.0390317	0.0378815	0.0414627
0.08	+	-0.0148966	D10	14.0723	hA9 M63F	190121	-4.05312e-05	-0.0256965	-0.0189528
		0.0279805	A1	11.8251	Buffer	190128	0.029805	-0.00896267	0.0630991
		0.0202944	A4	11.8251	PB	190128	0.0171923	0.016579	0.027112
		1	A7	11.8251	LPS	190128	0.945675	1.15627	0.898057
		3.46945e-18	A10	11.8251	LPS + PB	190128	0.0186831	0.00310831	-0.0217914
5	-	1.96364	C7	11.8251	hA9 M63F	190128	2.25384	1.55684	2.08023
5	+	0.491523	C10	11.8251	hA9 M63F	190128	0.560646	0.425958	0.487965
5	++	0.432873	D1	11.8251	hA9 M63F	190128	0.386196	0.580772	0.331651
2	+	0.383473	D4	11.8251	hA9 M63F	190128	0.590473	0.290413	0.269532
0.4	+	0.108574	D7	11.8251	hA9 M63F	190128	0.129517	0.0539062	0.142298
0.08	+	0.0365661	D10	11.8251	hA9 M63F	190128	0.0722153	0.032728	0.00475511
		-0.0212939	A1	11.9606	Buffer	190130	0.0057608	-0.0525138	-0.0171286
		-0.0423045	A4	11.9606	PB	190130	-0.0261908	-0.0389416	-0.0617811
		1	A7	11.9606	LPS	190130	1.03683	0.922489	1.04068
		6.93889e-18	A10	11.9606	LPS + PB	190130	-0.0281713	0.0624547	-0.0342833
5	-	2.50793	C7	11.9606	hA9 M63F	190130	2.27229	2.78065	2.47085
5	+	0.464434	C10	11.9606	hA9 M63F	190130	0.671171	0.434436	0.287695
5	++	0.572943	D1	11.9606	hA9 M63F	190130	0.633364	0.580033	0.505431
2	+	0.460273	D4	11.9606	hA9 M63F	190130	0.617275	0.419001	0.344542
0.4	+	0.111774	D7	11.9606	hA9 M63F	190130	0.161367	0.098822	0.0751338
0.08	+	0.0344631	D10	11.9606	hA9 M63F	190130	0.0389666	0.0103803	0.0540424
		-0.032133	A1	4.63654	Buffer	190219	-0.0354158	-0.033684	-0.0272992
		0.0122403	A4	4.63654	PB	190219	-0.00418751	0.0108516	0.0300568
		1	A7	4.63654	LPS	190219	1.02093	0.940228	1.03885
		1.32995e-17	A10	4.63654	LPS + PB	190219	0.0134706	-0.01037	-0.00310067
5	-	1.73332	C7	4.63654	hA8	190219	2.17483	1.55192	1.47321
5	+	0.298978	C10	4.63654	hA8	190219	0.485258	0.241227	0.170449
5	++	0.35556	D1	4.63654	hA8	190219	0.370252	0.380814	0.315614
2	+	0.119296	D4	4.63654	hA8	190219	0.177377	0.116876	0.0636342
0.4	+	0.00140696	D7	4.63654	hA8	190219	0.023047	-0.00756687	-0.0112592
0.08	+	-0.0218814	D10	4.63654	hA8	190219	-0.0301691	-0.0181352	-0.0173399
5	-	0.822904	E1	4.63654	hA8 F55M	190219	0.677875	1.03214	0.758702
5	+	0.359638	E4	4.63654	hA8 F55M	190219	0.370648	0.341652	0.366613
5	++	0.291794	E7	4.63654	hA8 F55M	190219	0.348847	0.334664	0.19187
2	+	0.0875931	E10	4.63654	hA8 F55M	190219	0.104875	0.0856254	0.0722787
0.4	+	-0.019783	F1	4.63654	hA8 F55M	190219	0.00847641	-0.0232874	-0.0445381
0.08	+	-0.0395966	F4	4.63654	hA8 F55M	190219	-0.0356973	-0.0295348	-0.0535577
5	-	0.320132	F7	4.63654	hA12	190219	0.332107	0.338694	0.289594
5	+	-0.0414628	F10	4.63654	hA12	190219	-0.0394326	-0.0424282	-0.0425276
5	++	-0.0266463	G1	4.63654	hA12	190219	-0.0189615	-0.017385	-0.0435925
2	+	-0.0349866	G4	4.63654	hA12	190219	-0.0201128	-0.0536802	-0.0311667
0.4	+	-0.0229525	G7	4.63654	hA12	190219	-0.0345736	-0.0358477	0.00156367
0.08	+	-0.0229054	G10	4.63654	hA12	190219	-0.0271444	-0.0119778	-0.029594
		0.00972149	A1	5.88331	Buffer	190220	0.0218689	0.00160708	0.00568847
		-0.00686445	A4	5.88331	PB	190220	-0.00246847	-0.00943188	-0.00869299
		1	A7	5.88331	LPS	190220	1.09481	0.948984	0.956202
		0	A10	5.88331	LPS + PB	190220	0.0121474	0.00107762	-0.0132251
5	-	4.31024	B1	5.88331	hA9	190220	4.06557	4.00231	4.86285
5	+	3.79315	B4	5.88331	hA9	190220	4.35722	3.46105	3.56119
5	++	3.51088	B7	5.88331	hA9	190220	4.03438	3.5392	2.95907
2	+	2.33974	B10	5.88331	hA9	190220	2.44526	2.65142	1.92253
0.4	+	1.32372	C1	5.88331	hA9	190220	1.1088	1.39803	1.46435
0.08	+	0.380659	C4	5.88331	hA9	190220	0.394041	0.392757	0.355179
5	-	1.95951	C7	5.88331	hA8	190220	2.14044	1.87142	1.86667
5	+	0.354887	C10	5.88331	hA8	190220	0.377379	0.386544	0.30074
5	++	0.305873	D1	5.88331	hA8	190220	0.256761	0.286224	0.374634
2	+	0.165099	D4	5.88331	hA8	190220	0.245208	0.122039	0.128048
0.4	+	0.0515074	D7	5.88331	hA8	190220	0.0570234	0.044047	0.0534517
0.08	+	0.0178463	D10	5.88331	hA8	190220	0.02019	0.0209084	0.0124406
5	-	1.63645	E1	5.88331	hA8 F55M	190220	1.68556	1.75283	1.47097
5	+	0.504659	E4	5.88331	hA8 F55M	190220	0.544691	0.552763	0.416524
5	++	0.388121	E7	5.88331	hA8 F55M	190220	0.398755	0.301428	0.46418
2	+	0.270819	E10	5.88331	hA8 F55M	190220	0.27995	0.33218	0.200326
0.4	+	0.0360035	F1	5.88331	hA8 F55M	190220	0.0652825	0.025657	0.0170709
0.08	+	0.0244744	F4	5.88331	hA8 F55M	190220	0.0252385	0.0338278	0.014357
5	-	0.506246	F7	5.88331	hA12	190220	0.445878	0.544086	0.528775
5	+	0.0138404	F10	5.88331	hA12	190220	0.0208996	0.00971753	0.0109042
5	++	0.020185	G1	5.88331	hA12	190220	0.000132305	0.0372879	0.0231348
2	+	0.0161489	G4	5.88331	hA12	190220	0.020802	0.025988	0.00165675
0.4	+	0.0104489	G7	5.88331	hA12	190220	0.013149	0.0166887	0.001509
0.08	+	0.00325708	G10	5.88331	hA12	190220	0.00879962	-0.0172733	0.0182449
		0.0332888	A1	6.41888	Buffer	190220	0.0626725	0.0303912	0.00680284
		-0.000722712	A4	6.41888	PB	190220	-0.0015942	0.00752261	-0.00809655
		1	A7	6.41888	LPS	190220	0.953519	1.02294	1.02354
		1.4456e-19	A10	6.41888	LPS + PB	190220	0.002889	-0.000923994	-0.00196501
5	-	3.34572	B1	6.41888	hA9	190220	3.29942	3.02704	3.71071
5	+	2.96148	B4	6.41888	hA9	190220	3.75293	2.74166	2.38984
5	++	2.86296	B7	6.41888	hA9	190220	3.2554	2.60786	2.72563
2	+	2.01194	B10	6.41888	hA9	190220	2.33188	2.12693	1.577
0.4	+	0.770973	C1	6.41888	hA9	190220	0.652056	0.918271	0.742592
0.08	+	0.192723	C4	6.41888	hA9	190220	0.256326	0.176212	0.145633
5	-	1.43706	C7	6.41888	hA8	190220	1.40926	1.34955	1.55237
5	+	0.248363	C10	6.41888	hA8	190220	0.291992	0.295211	0.157887
5	++	0.251525	D1	6.41888	hA8	190220	0.236032	0.227772	0.290772
2	+	0.118917	D4	6.41888	hA8	190220	0.129288	0.119014	0.108448
0.4	+	0.028162	D7	6.41888	hA8	190220	0.0403721	0.0185828	0.0255309
0.08	+	0.0366031	D10	6.41888	hA8	190220	0.0730677	0.0337253	0.00301643
5	-	1.68224	E1	6.41888	hA8 F55M	190220	1.83311	1.72277	1.49083
5	+	0.351586	E4	6.41888	hA8 F55M	190220	0.4051	0.279861	0.369797
5	++	0.332717	E7	6.41888	hA8 F55M	190220	0.433353	0.261592	0.303206
2	+	0.165085	E10	6.41888	hA8 F55M	190220	0.254566	0.136729	0.103958
0.4	+	0.0352141	F1	6.41888	hA8 F55M	190220	0.0208935	0.0221816	0.0625673
0.08	+	0.0299778	F4	6.41888	hA8 F55M	190220	0.0444733	0.00221406	0.0432462
5	-	0.337224	F7	6.41888	hA12	190220	0.366601	0.392355	0.252716
5	+	0.0218979	F10	6.41888	hA12	190220	0.0522546	0.00390741	0.00953181
5	++	0.0180011	G1	6.41888	hA12	190220	0.0200053	0.0236982	0.0102999
2	+	0.0175597	G4	6.41888	hA12	190220	0.00666021	0.0230629	0.0229558
0.4	+	0.0376782	G7	6.41888	hA12	190220	0.0504446	0.0346973	0.0278927
0.08	+	0.0119605	G10	6.41888	hA12	190220	0.0177969	0.00833264	0.00975188
		0.019206	A1	26.2873	Buffer	190115	-0.00588718	0.0603926	0.00311262
		0.000985697	A4	26.2873	PB	190115	-0.00907722	0.00147459	0.0105597
		1	A7	26.2873	LPS	190115	1.30118	0.899962	0.798863
		-5.78241e-18	A10	26.2873	LPS + PB	190115	-0.0132988	0.0218109	-0.00851213
5	-	0.97915	E1	26.2873	hCP	190115	0.86625	0.980359	1.09084
5	+	0.16875	E4	26.2873	hCP	190115	0.110361	0.150708	0.245181
5	++	0.124032	E7	26.2873	hCP	190115	0.108406	0.153669	0.110022
2	+	0.0784001	E10	26.2873	hCP	190115	0.0610195	0.0938606	0.0803203
0.4	+	0.00609953	F1	26.2873	hCP	190115	0.00870144	0.00989372	-0.000296561
0.08	+	0.0108796	F4	26.2873	hCP	190115	0.0169814	0.028498	-0.0128405
5	-	0.263984	F7	26.2873	hCP M63F	190115	0.261763	0.206263	0.323927
5	+	0.081515	F10	26.2873	hCP M63F	190115	0.0609942	0.112794	0.0707566
5	++	0.0105566	G1	26.2873	hCP M63F	190115	0.0033548	0.0129459	0.0153691
2	+	0.0107503	G4	26.2873	hCP M63F	190115	0.0154002	0.0129308	0.00391989
0.4	+	0.00437932	G7	26.2873	hCP M63F	190115	-0.0148486	0.0206761	0.00731044
0.08	+	0.0211552	G10	26.2873	hCP M63F	190115	0.00572819	-0.0252954	0.0830327
		1	A1	14.0786	LPS	190301	0.884014	1.06194	1.05405
		7.77012e-19	A4	14.0786	LPS + PB	190301	-0.00182429	0.00209935	-0.000275061
2	+	0.0242186	A7	14.0786	ancA9	190301	0.0118658	0.0179066	0.0428835
2	++	0.0108113	A10	14.0786	ancA9	190301	0.0117715	0.0164518	0.00421064
2	+	0.0155831	B1	14.0786	ancA9 M59F	190301	0.00685118	0.00852023	0.0313779
2	++	0.0167811	B4	14.0786	ancA9 M59F	190301	0.0175495	0.00780289	0.024991
2	+	0.127771	B7	14.0786	altancA9	190301	0.116306	0.14065	0.126359
2	++	0.102675	B10	14.0786	altancA9	190301	0.145364	0.0876231	0.0750389
		0.0102388	A1	14.0723	Buffer	190124	0.0683243	-0.0247091	-0.0128989
		-0.0111233	A4	14.0723	PB	190124	-0.00894255	-0.0127641	-0.0116631
		1	A7	14.0723	LPS	190124	1.09781	1.01942	0.882769
		-2.31296e-18	A10	14.0723	LPS + PB	190124	0.0479938	-0.0299916	-0.0180023
2	-	0.0235045	H1	14.0723	hA12	190124	0.0107277	0.0124021	0.0473836
2	+	-0.0142167	H4	14.0723	hA12	190124	-0.0152193	-0.0133937	-0.0140371
2	-	0.650904	H7	14.0723	ancCG	190124	0.713814	0.59918	0.639717
2	+	-0.0044429	H10	14.0723	ancCG	190124	0.0461167	-0.0202398	-0.0392056
		-0.0185322	A1	19.139	Buffer	190115	-0.00123484	-0.0468824	-0.0074795
		-0.0222747	A4	19.139	PB	190115	-0.0149358	-0.0146162	-0.0372722
		1	A7	19.139	LPS	190115	1.11303	0.975241	0.911734
		9.25186e-18	A10	19.139	LPS + PB	190115	-0.02582	-0.0285524	0.0543723
2	-	0.135691	E1	19.139	hCP	190115	0.0865863	0.165855	0.154632
2	+	-0.0158022	E4	19.139	hCP	190115	-0.00901664	0.00371093	-0.042101
2	++	-0.0041915	E7	19.139	hCP	190115	-0.0310593	-0.0176347	0.0361196
1	+	-0.0674787	E10	19.139	hCP	190115	-0.0499432	-0.0704107	-0.0820823
1	+	0.0119438	F1	19.139	hCP	190115	0.0419519	-0.0124752	0.00635482
1	+	0.0145999	F4	19.139	hCP	190115	0.0235387	0.00950597	0.0107549
2	-	0.0776865	F7	19.139	hCP M63F	190115	0.0815352	0.112775	0.0387496
2	+	0.0154889	F10	19.139	hCP M63F	190115	0.0767962	-0.0184701	-0.0118593
2	++	-0.0420362	G1	19.139	hCP M63F	190115	-0.0224065	-0.0485711	-0.055131
1	+	0.0174314	G4	19.139	hCP M63F	190115	-0.00916227	0.0643945	-0.00293793
1	+	0.00261991	G7	19.139	hCP M63F	190115	0.0174991	0.0106003	-0.0202397
1	+	-0.0211546	G10	19.139	hCP M63F	190115	-0.0267733	-0.0144735	-0.0222169
		0.00905022	D1	31.3634	Buffer	190117	0.000918049	-0.00932067	0.0355533
		0.00468683	D4	31.3634	PB	190117	0.0143457	0.017849	-0.0181342
		1	D7	31.3634	LPS	190117	1.03711	1.09197	0.870913
		0	D10	31.3634	LPS + PB	190117	0.00676625	0.0165567	-0.0233229
2	-	1.73442	E1	31.3634	hA9	190117	1.4565	1.65242	2.09433
2	+	2.06785	E4	31.3634	hA9	190117	1.88564	2.27835	2.03955
2	++	2.13651	E7	31.3634	hA9	190117	2.45756	1.74821	2.20376
1	+	1.80951	E10	31.3634	hA9	190117	1.37839	1.72925	2.32091
1	+	1.5227	F1	31.3634	hA9	190117	1.77512	1.30395	1.48902
1	+	0.741657	F4	31.3634	hA9	190117	0.620148	0.981311	0.62351
2	-	1.66211	F7	31.3634	hA9 M63F	190117	1.84801	1.65263	1.48568
2	+	0.686015	F10	31.3634	hA9 M63F	190117	0.736684	0.62636	0.695002
2	++	0.567506	G1	31.3634	hA9 M63F	190117	0.478593	0.410359	0.813566
1	+	0.268368	G4	31.3634	hA9 M63F	190117	0.292658	0.302767	0.209679
1	+	0.538214	G7	31.3634	hA9 M63F	190117	0.61117	0.433405	0.570066
1	+	0.383353	G10	31.3634	hA9 M63F	190117	0.467807	0.399042	0.283211
		0.0102388	A1	14.0723	Buffer	190124	0.0683243	-0.0247091	-0.0128989
		-0.0111233	A4	14.0723	PB	190124	-0.00894255	-0.0127641	-0.0116631
		1	A7	14.0723	LPS	190124	1.09781	1.01942	0.882769
		-2.31296e-18	A10	14.0723	LPS + PB	190124	0.0479938	-0.0299916	-0.0180023
2	-	2.47783	E1	14.0723	hA9	190124	2.17919	2.68491	2.56938
2	+	1.45442	E4	14.0723	hA9	190124	1.55454	1.62211	1.18661
1	+	1.17923	E7	14.0723	hA9	190124	1.14929	1.18713	1.20127
1	+	0.322626	E10	14.0723	hA9	190124	0.293805	0.335215	0.338859
1	+	0.0518849	F1	14.0723	hA9	190124	0.0614099	0.0473821	0.0468627
1	+	0.0128049	F4	14.0723	hA9	190124	0.0383778	0.00452074	-0.00448374
2	-	0.742838	F7	14.0723	hA9 M63F	190124	0.876912	0.826649	0.524954
2	+	0.13605	F10	14.0723	hA9 M63F	190124	0.16358	0.140094	0.104475
1	+	0.253499	G1	14.0723	hA9 M63F	190124	0.328279	0.222607	0.20961
1	+	0.116505	G4	14.0723	hA9 M63F	190124	0.0954723	0.146864	0.107179
1	+	0.102344	G7	14.0723	hA9 M63F	190124	0.127575	0.116837	0.0626194
1	+	0.0691626	G10	14.0723	hA9 M63F	190124	0.0990965	0.0695048	0.0388864
		0.0279805	A1	11.8251	Buffer	190128	0.029805	-0.00896267	0.0630991
		0.0202944	A4	11.8251	PB	190128	0.0171923	0.016579	0.027112
		1	A7	11.8251	LPS	190128	0.945675	1.15627	0.898057
		3.46945e-18	A10	11.8251	LPS + PB	190128	0.0186831	0.00310831	-0.0217914
2	-	2.28736	E1	11.8251	hA9	190128	2.13855	2.83115	1.89238
2	+	2.57586	E4	11.8251	hA9	190128	2.79162	2.51069	2.42528
1	+	1.68318	E7	11.8251	hA9	190128	1.47184	1.77001	1.8077
1	+	0.52188	E10	11.8251	hA9	190128	0.601739	0.59271	0.371191
1	+	0.197732	F1	11.8251	hA9	190128	0.193805	0.241104	0.158287
1	+	0.0860179	F4	11.8251	hA9	190128	0.0609435	0.0531541	0.143956
2	-	1.2554	F7	11.8251	hA9 M63F	190128	1.29634	1.11017	1.35968
2	+	0.296017	F10	11.8251	hA9 M63F	190128	0.365464	0.299355	0.223231
1	+	0.263966	G1	11.8251	hA9 M63F	190128	0.231715	0.311878	0.248306
1	+	0.195028	G4	11.8251	hA9 M63F	190128	0.187203	0.241016	0.156866
1	+	0.141799	G7	11.8251	hA9 M63F	190128	0.151477	0.165891	0.108029
1	+	0.16365	G10	11.8251	hA9 M63F	190128	0.181717	0.171227	0.138005
		-0.0212939	A1	11.9606	Buffer	190130	0.0057608	-0.0525138	-0.0171286
		-0.0423045	A4	11.9606	PB	190130	-0.0261908	-0.0389416	-0.0617811
		1	A7	11.9606	LPS	190130	1.03683	0.922489	1.04068
		6.93889e-18	A10	11.9606	LPS + PB	190130	-0.0281713	0.0624547	-0.0342833
2	-	2.63511	E1	11.9606	hA9	190130	2.66465	2.33351	2.90717
2	+	2.69277	E4	11.9606	hA9	190130	2.9042	2.59872	2.57537
1	+	2.57072	E7	11.9606	hA9	190130	2.91993	2.37931	2.41293
1	+	1.64903	E10	11.9606	hA9	190130	1.62525	1.66386	1.658
1	+	0.382152	F1	11.9606	hA9	190130	0.315058	0.579362	0.252036
1	+	0.0692806	F4	11.9606	hA9	190130	0.108722	0.0878364	0.0112837
2	-	0.999775	F7	11.9606	hA9 M63F	190130	0.853448	1.22572	0.920163
2	+	0.303752	F10	11.9606	hA9 M63F	190130	0.51786	0.295252	0.0981449
1	+	0.304902	G1	11.9606	hA9 M63F	190130	0.389629	0.206246	0.318832
1	+	0.372815	G4	11.9606	hA9 M63F	190130	0.313221	0.453719	0.351506
1	+	0.186509	G7	11.9606	hA9 M63F	190130	0.221263	0.206422	0.131841
1	+	0.131012	G10	11.9606	hA9 M63F	190130	0.155347	0.150603	0.0870851
