# Supplementary figures and images for: Evolution of multifunctionality through a pleiotropic substitution in the innate immune protein S100A9
Source: eLife journal article supplement (doi:10.7554/elife.54100), 2020-04-07

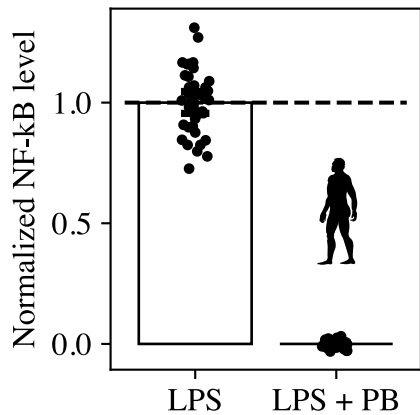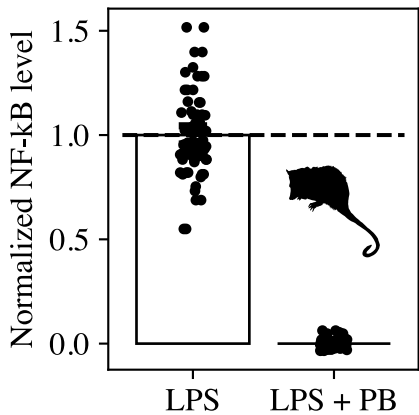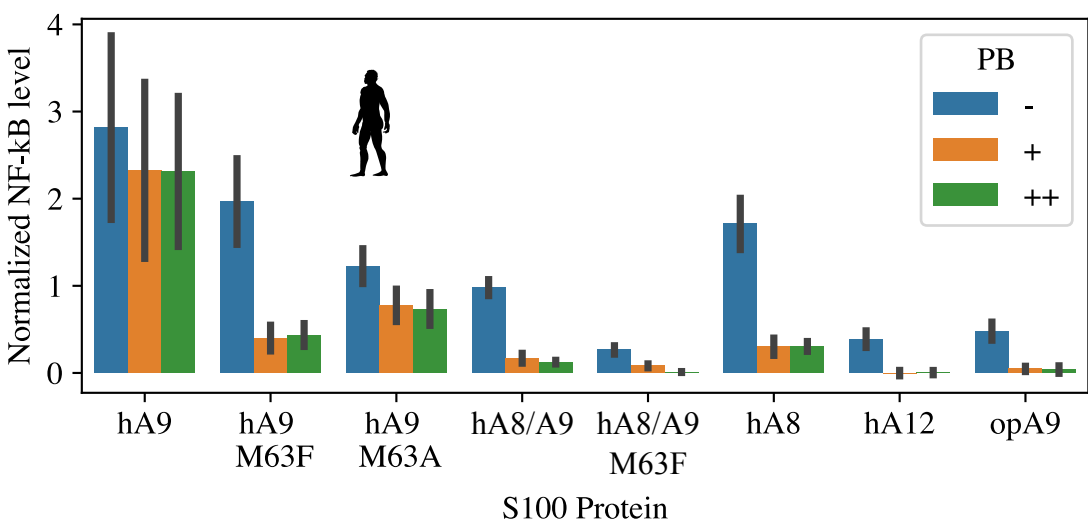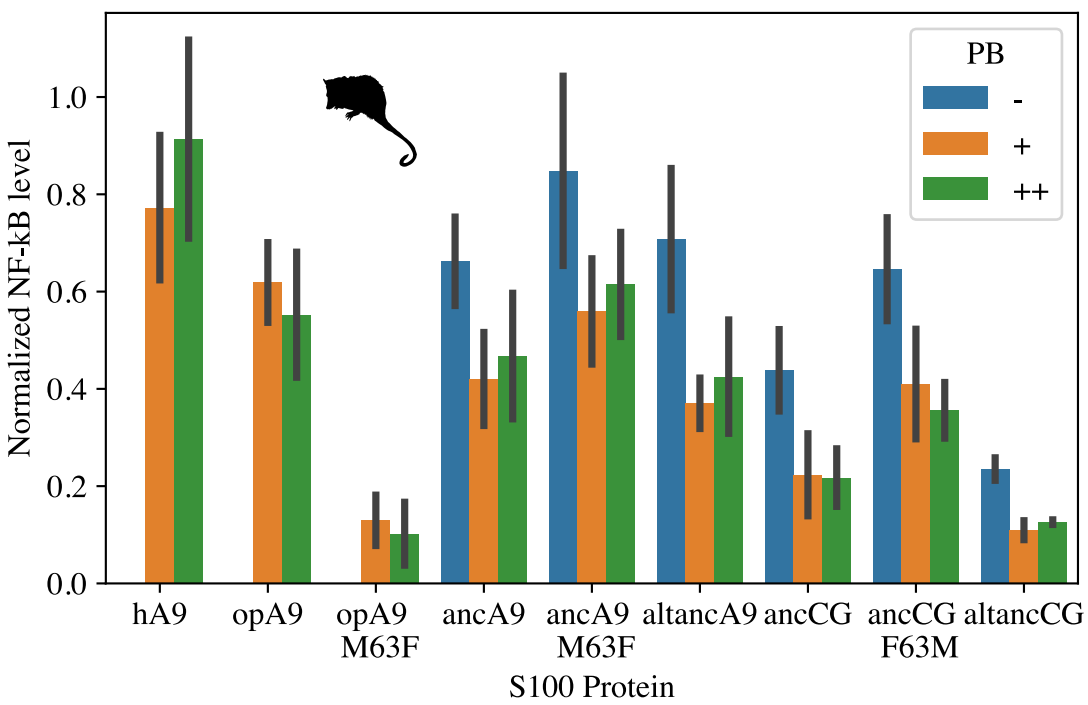

Supplement: supp [file elife-54100-supp-v1.zip]

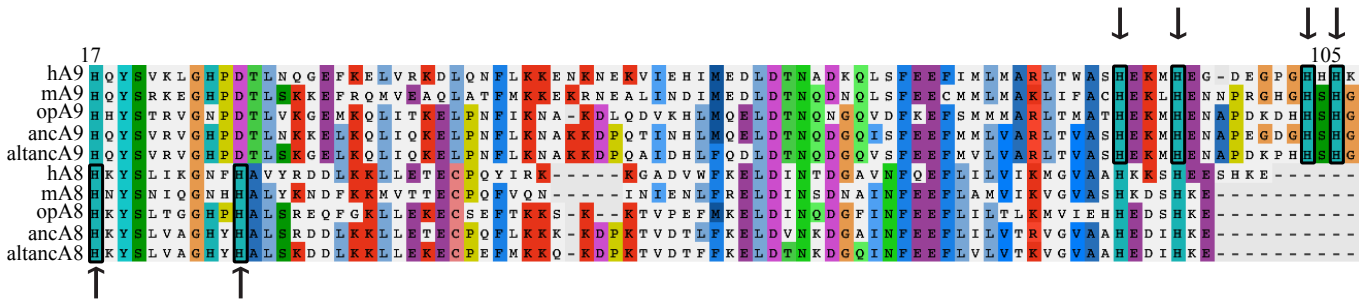

Supplement: supp [file elife-54100-supp-v1.zip]

hA8

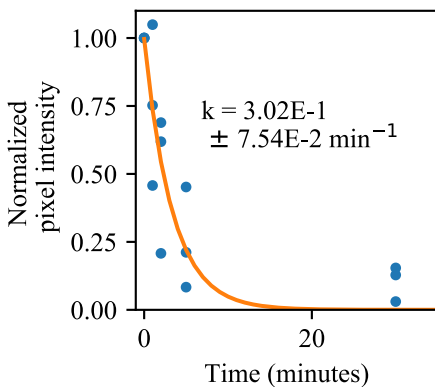

hA9

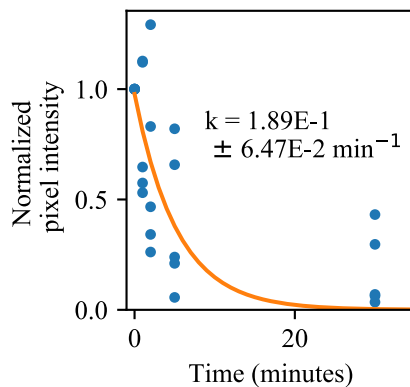

hA8/A9

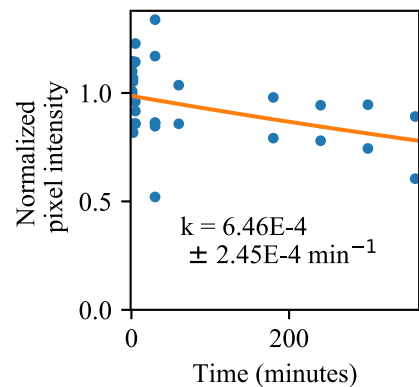

mA8

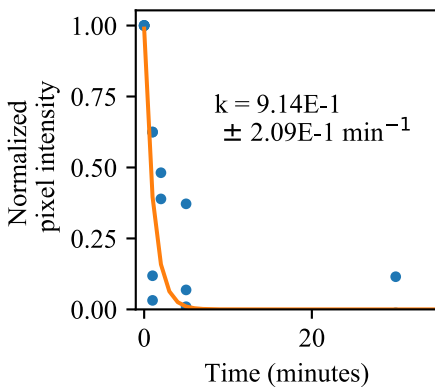

mA9

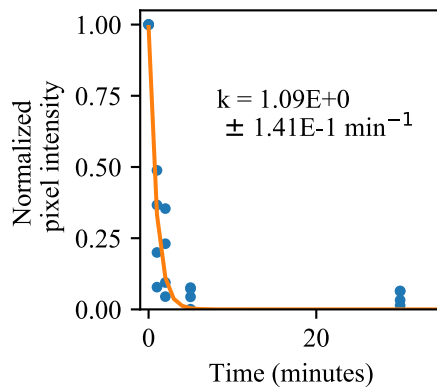

mA8/A9

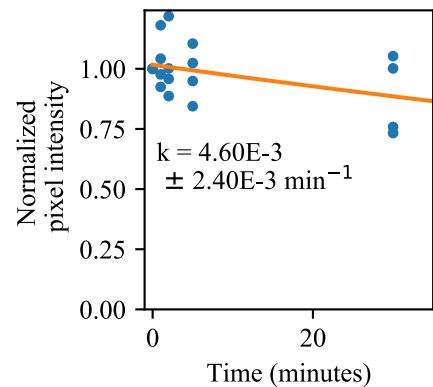

opA8

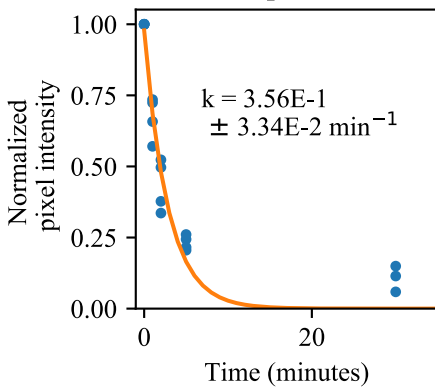

opA9

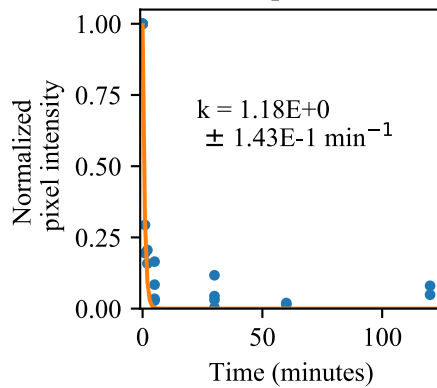

opA8/A9

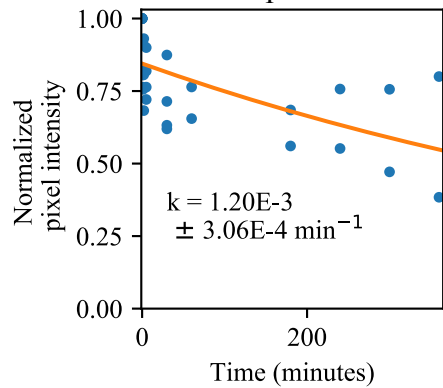

Supplement: supp [file elife-54100-supp-v1.zip]

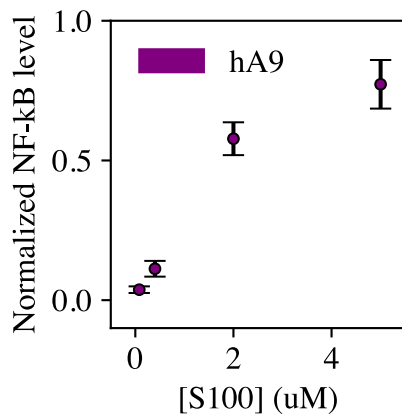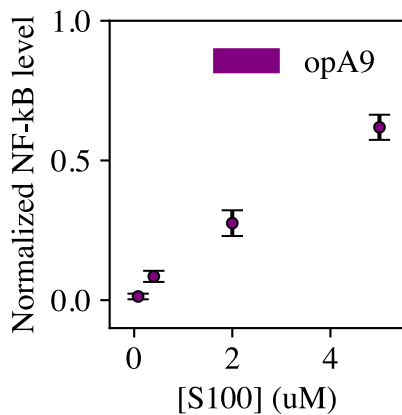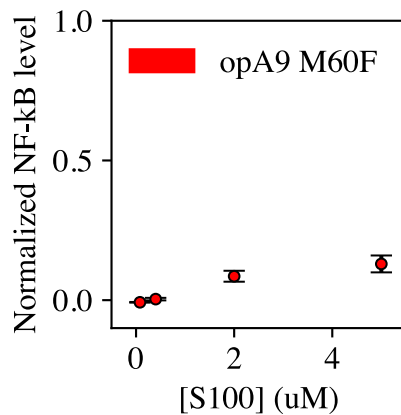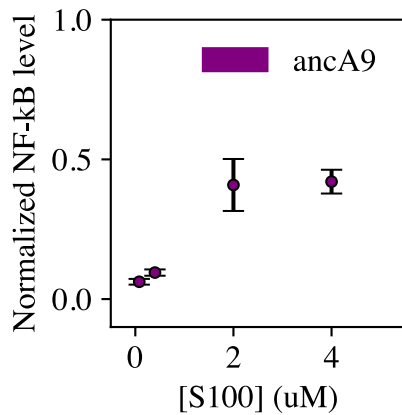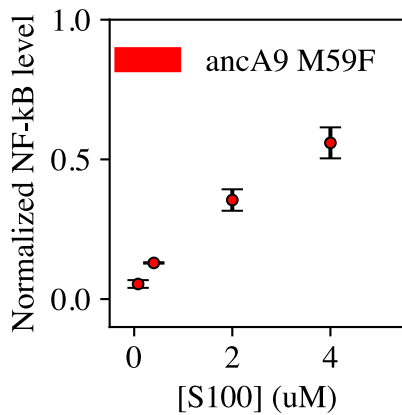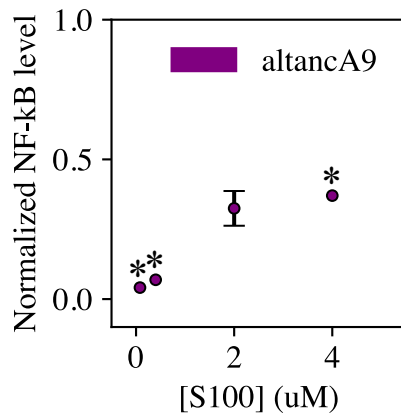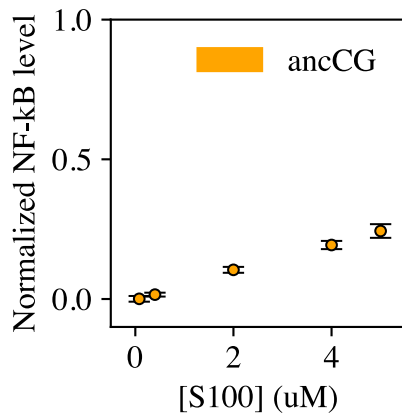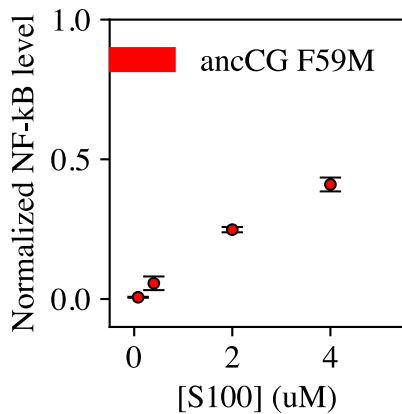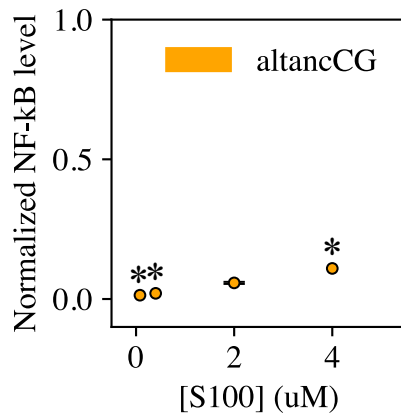

Supplement: supp [file elife-54100-supp-v1.zip]

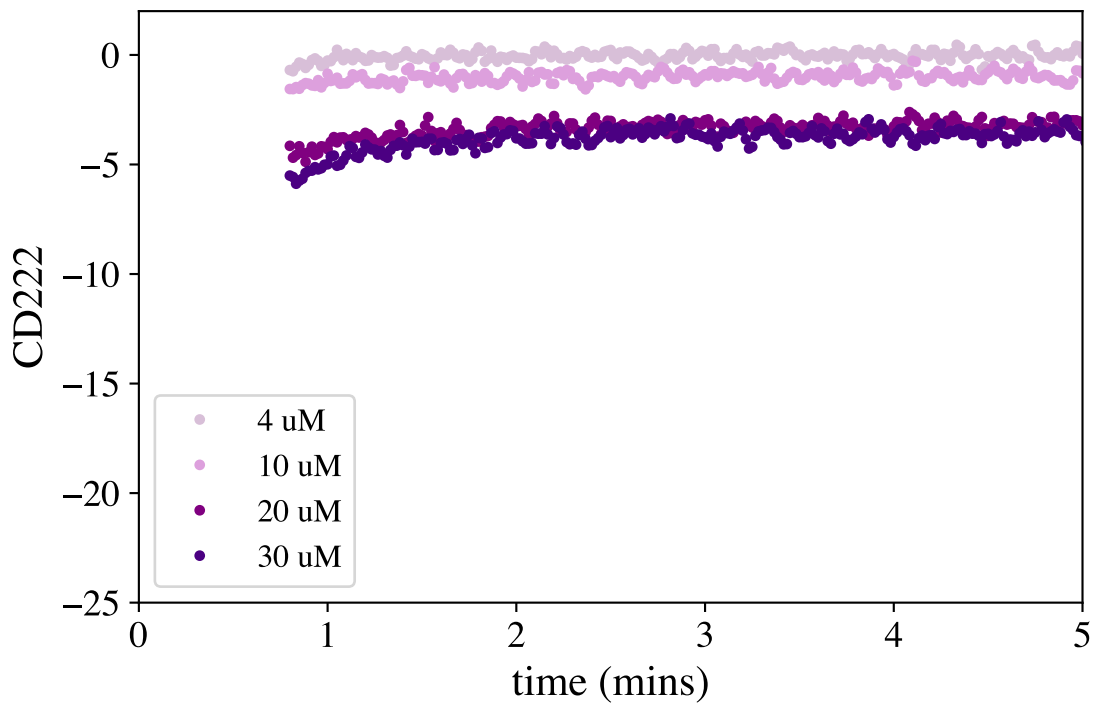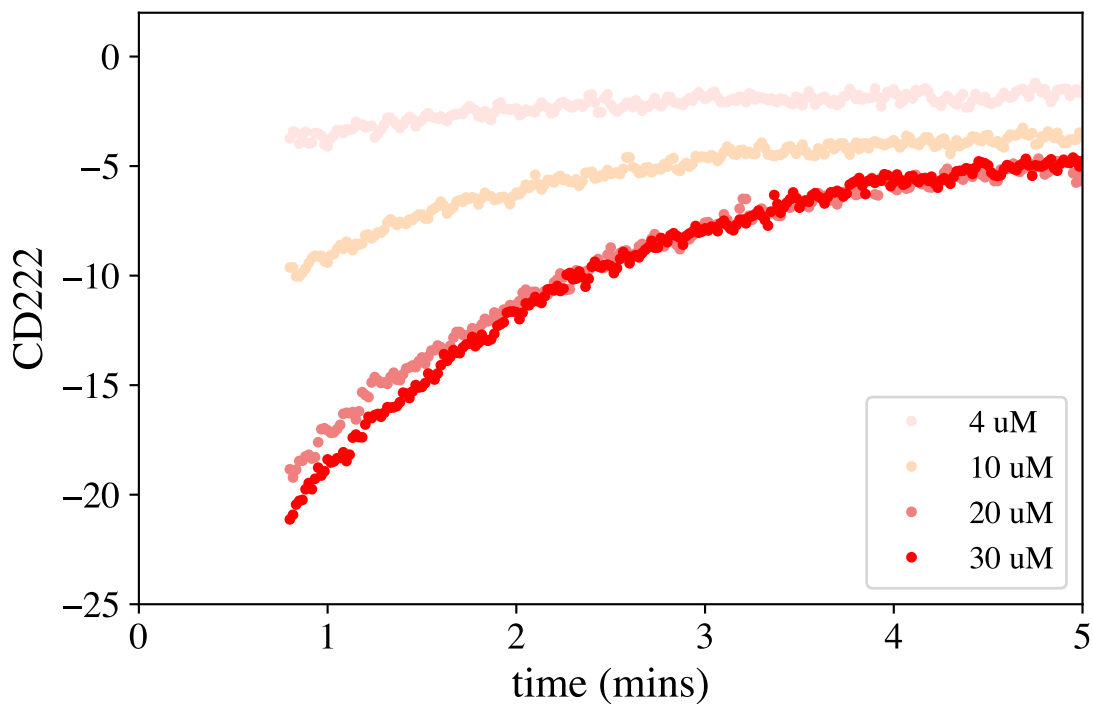

Supplement: supp [file elife-54100-supp-v1.zip]

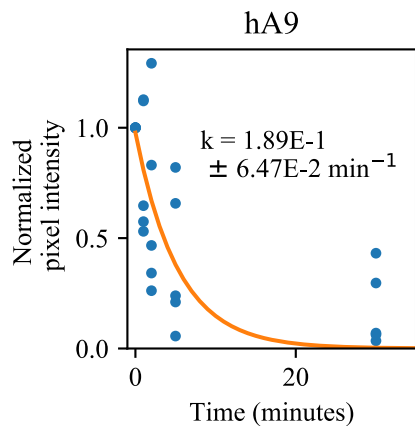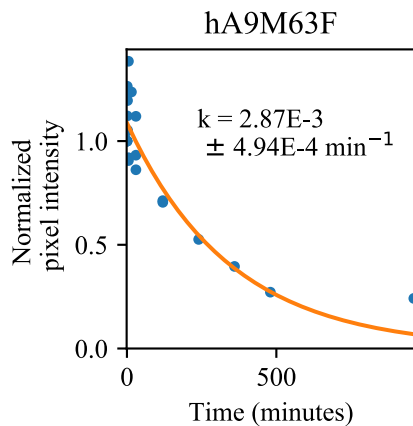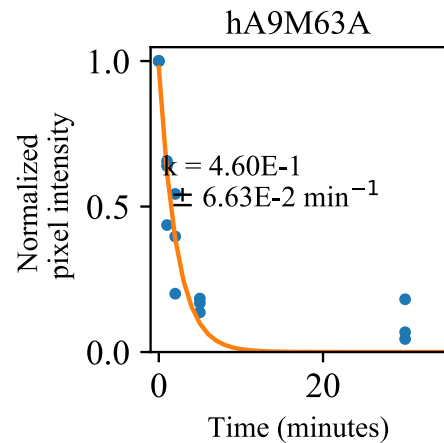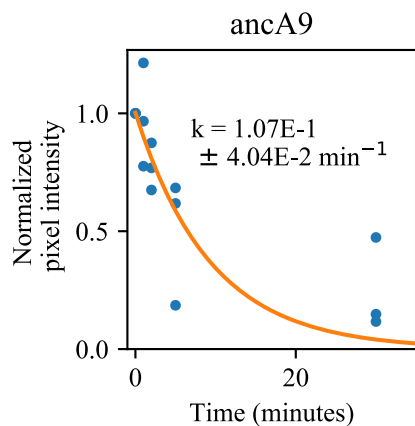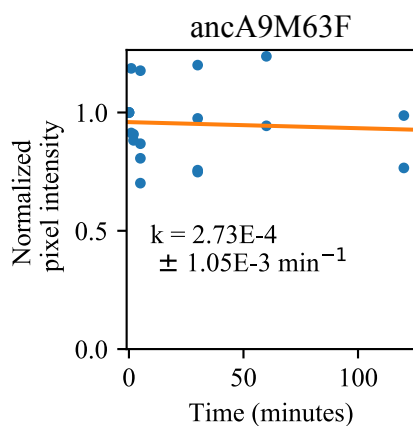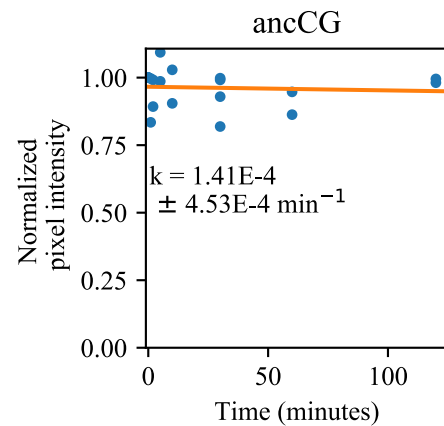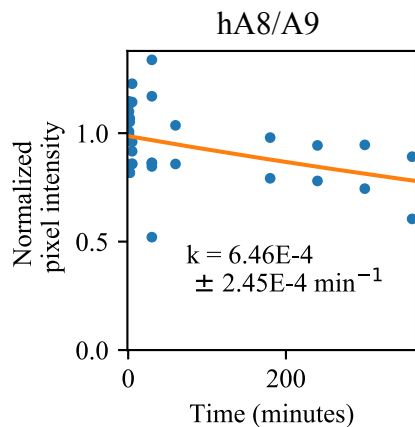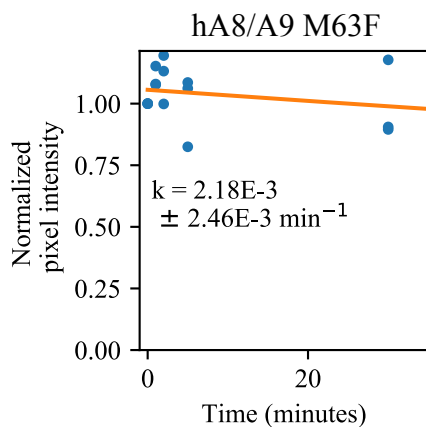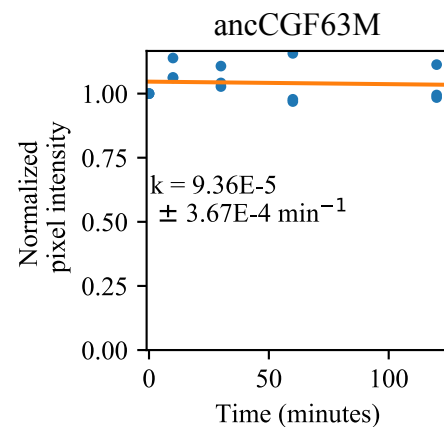

Supplement: supp [file elife-54100-supp-v1.zip]

ancCG

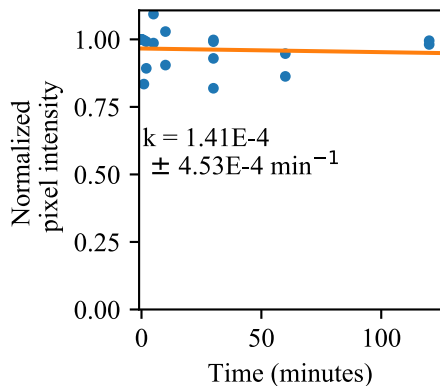

altancCG

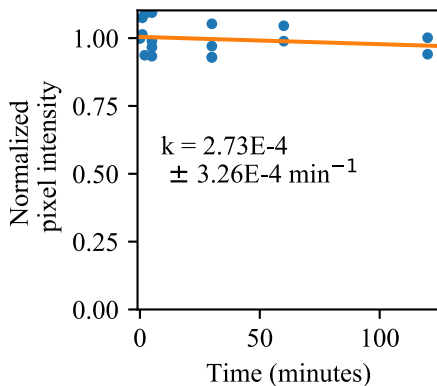

ancA8/A9

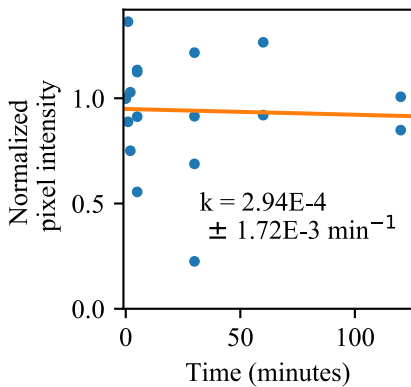

altancA8/A9

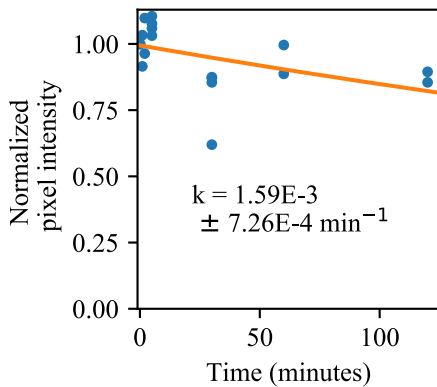

ancA9

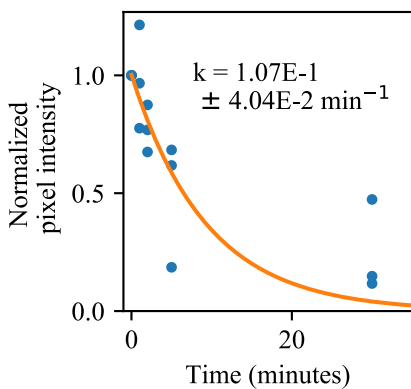

altancA9

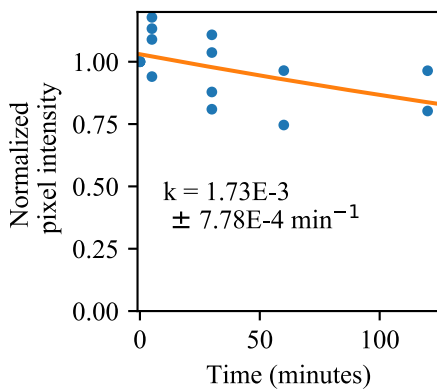

Supplement: supp [file elife-54100-supp-v1.zip]

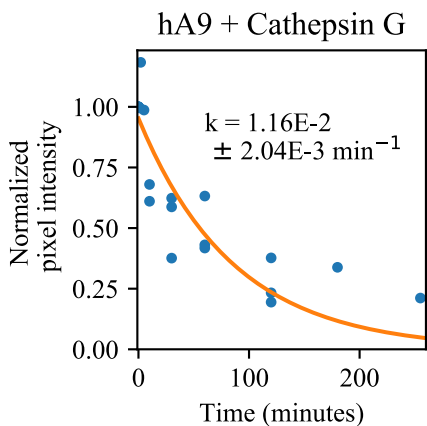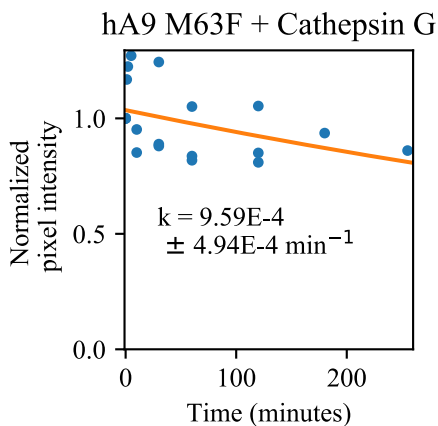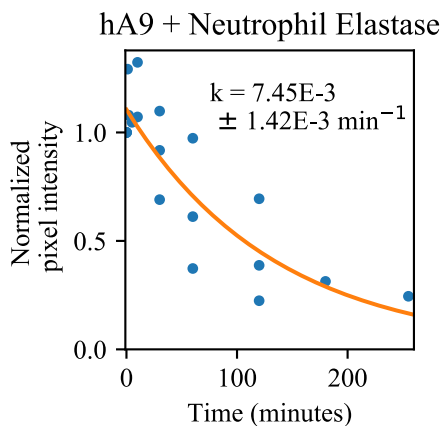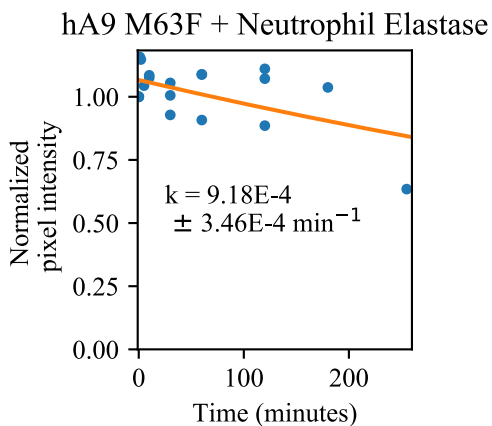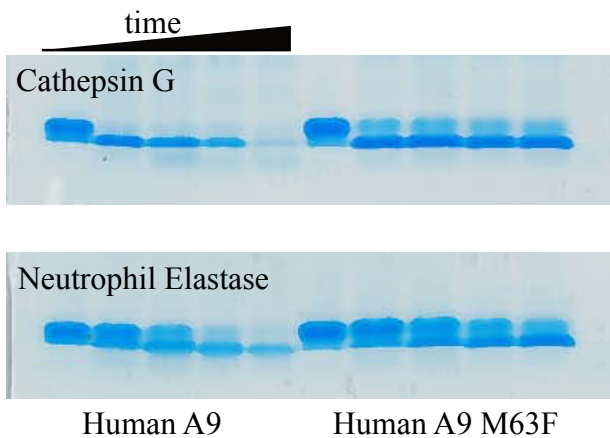

Supplement: supp [file elife-54100-supp-v1.zip]

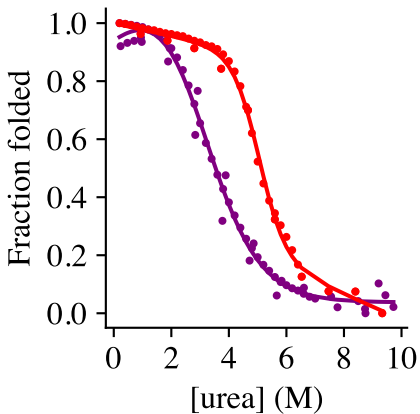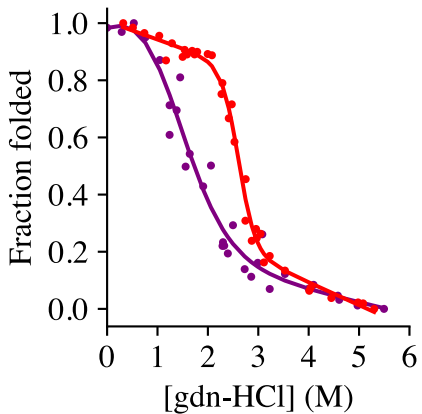

— hA9  
— hA9 M63F

Supplement: supp [file elife-54100-supp-v1.zip]

hA1

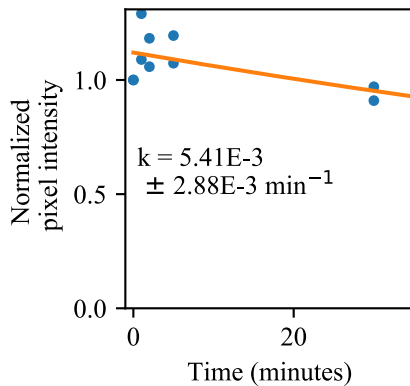

hA5

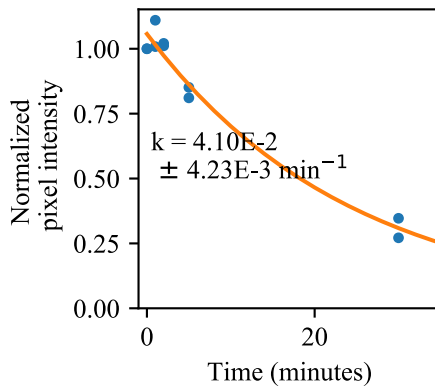

hA7

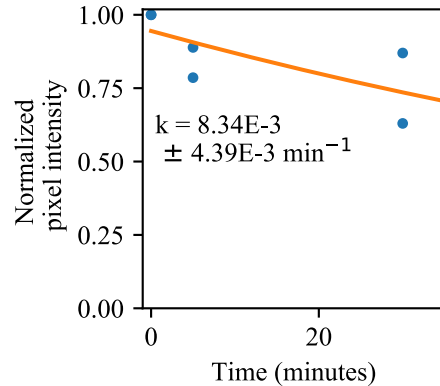

hA11

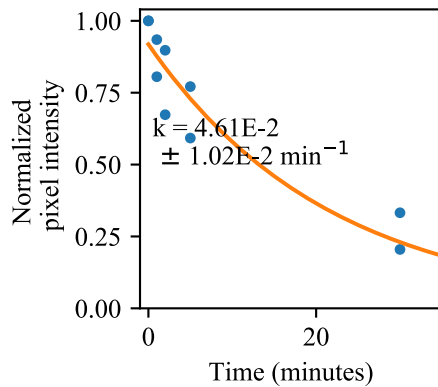

hA12

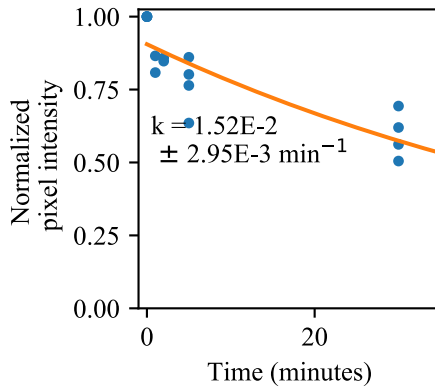

hA14

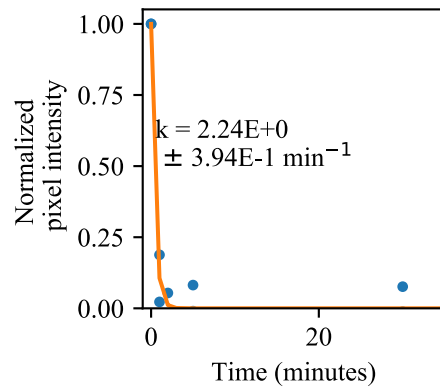

hS100P

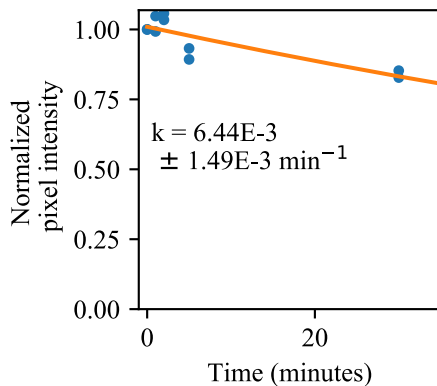

chMRP126

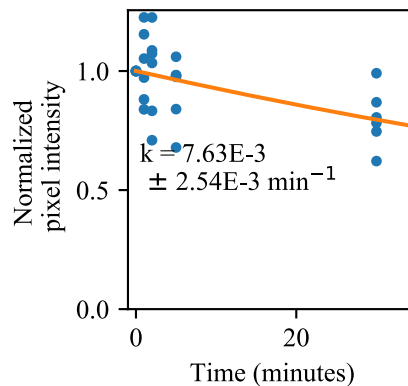

Supplement: supp [file elife-54100-supp-v1.zip]

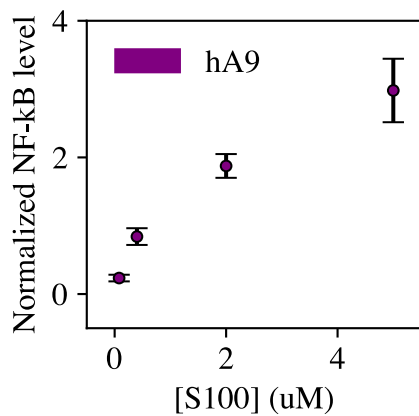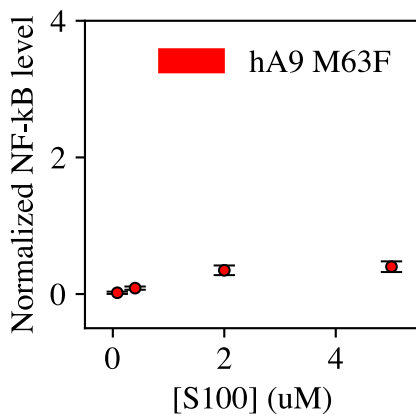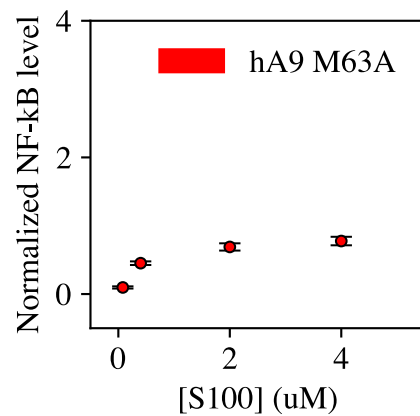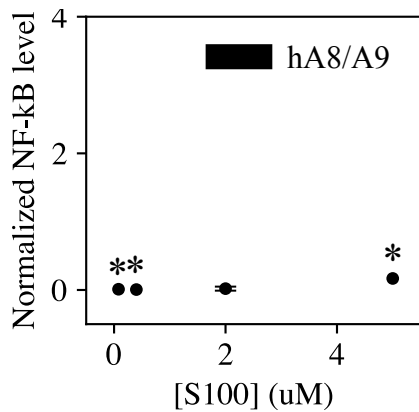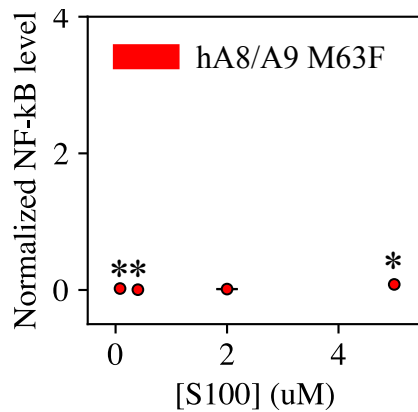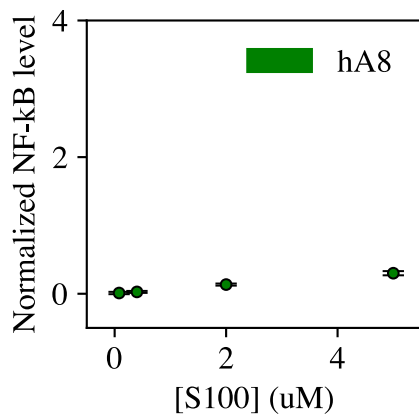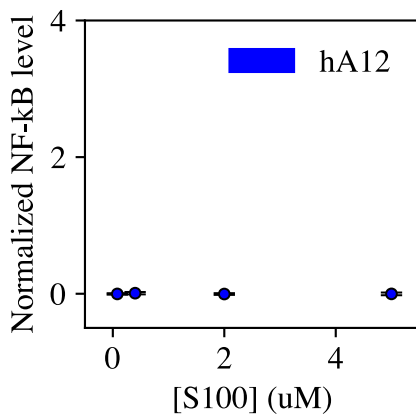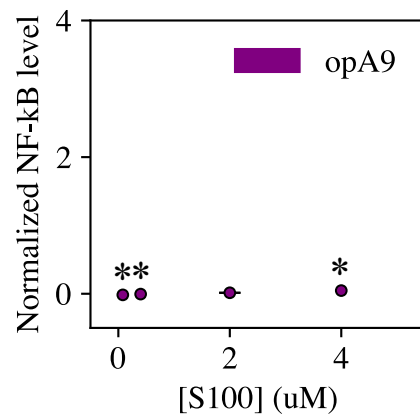

Supplement: supp [file elife-54100-supp-v1.zip › elife_poa_e54100_Figure_2_figure_supplement_2.pdf]

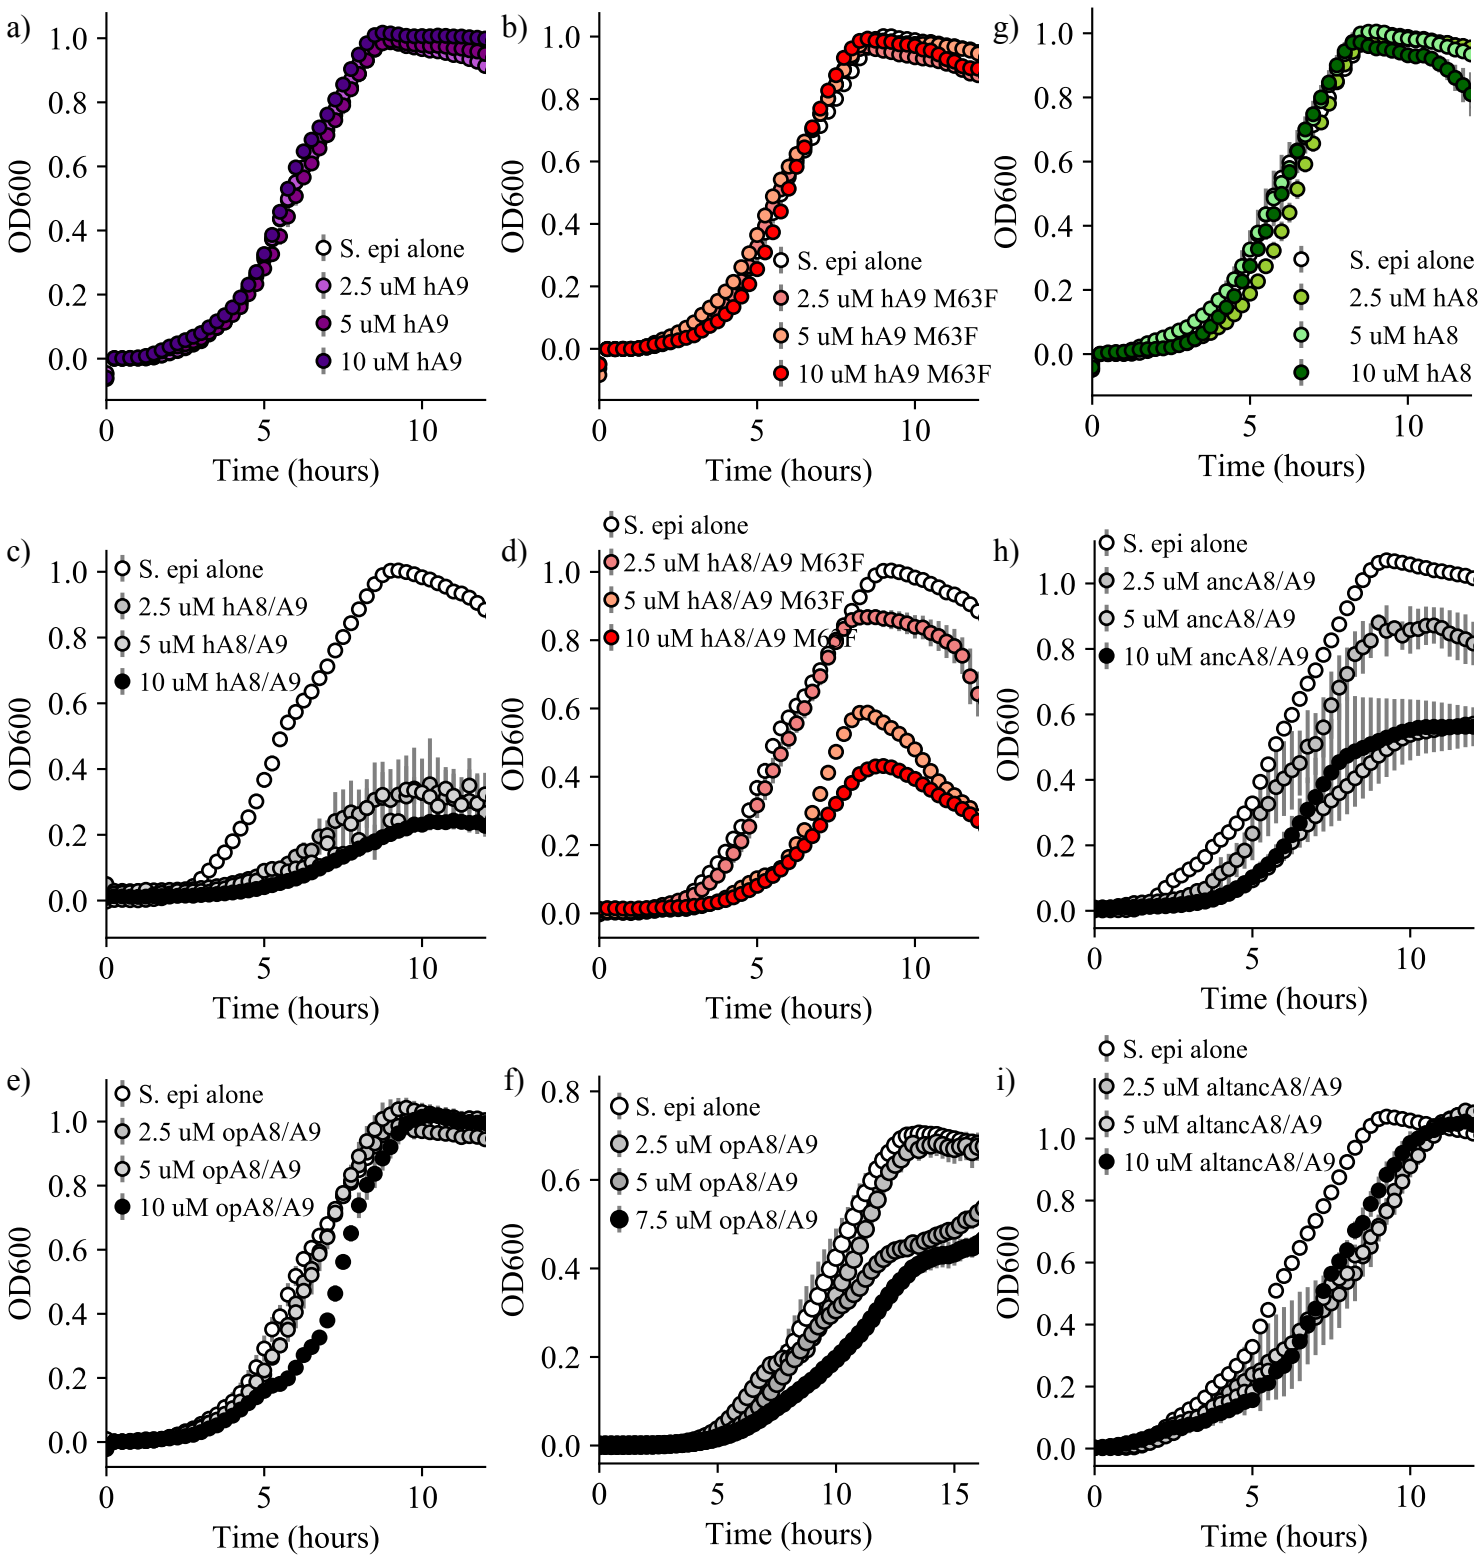

Supplement: supp [file elife-54100-supp-v1.zip › elife_poa_e54100_Figure_1_figure_supplement_3.pdf]

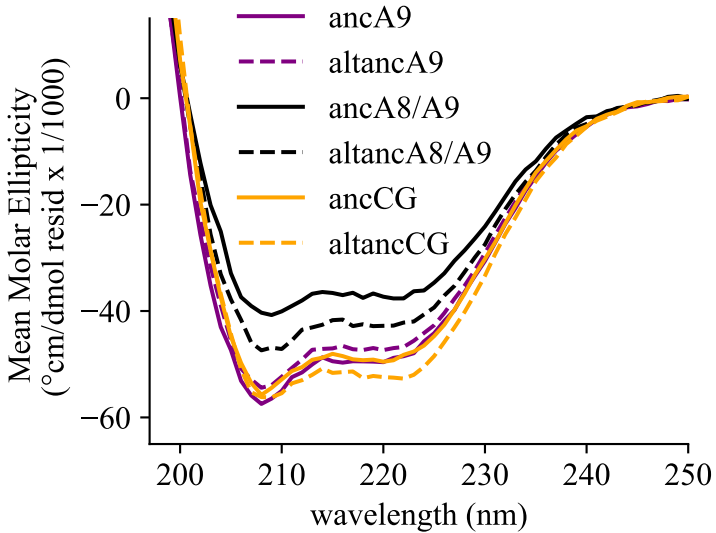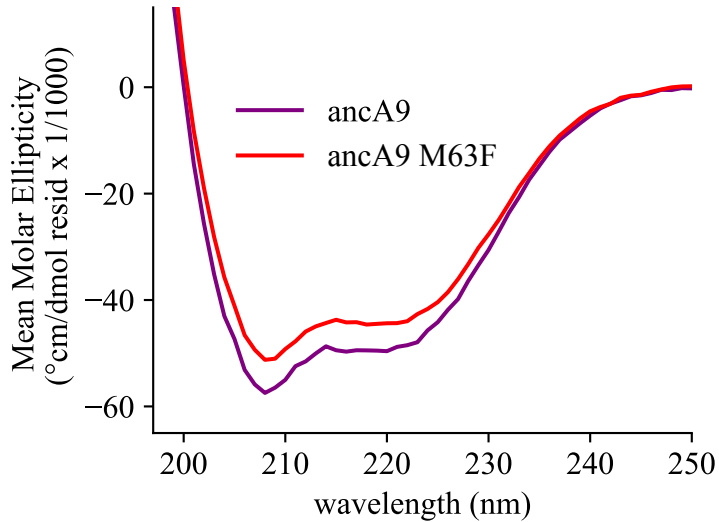

Supplement: supp [file elife-54100-supp-v1.zip › elife_poa_e54100_Figure_1_figure_supplement_5.pdf]
